# Supplementary material for: Cluster randomised controlled trial of home cook intervention to reduce salt intake in China: a protocol study
Source: PubMed Central journal article supplement — BMJ Open. 2020 May 7;10(5):e033842. doi: 10.1136/bmjopen-2019-033842 (PMC7228508; doi:10.1136/bmjopen-2019-033842), 2020-05-07
Supplement: bmjopen-2019-033842.draft_revisions.pdf [file bmjopen-2019-033842.draft_revisions.pdf]

# BMJ Open

BMJ Open is committed to open peer review. As part of this commitment we make the peer review history of every article we publish publicly available.

When an article is published we post the peer reviewers' comments and the authors' responses online. We also post the versions of the paper that were used during peer review. These are the versions that the peer review comments apply to.

The versions of the paper that follow are the versions that were submitted during the peer review process. They are not the versions of record or the final published versions. They should not be cited or distributed as the published version of this manuscript.

BMJ Open is an open access journal and the full, final, typeset and author-corrected version of record of the manuscript is available on our site with no access controls, subscription charges or pay-per-view fees (<http://bmjopen.bmj.com>).

If you have any questions on BMJ Open's open peer review process please email [info.bmjopen@bmj.com](mailto:info.bmjopen@bmj.com)

# BMJ Open

## Protocol for a cluster randomized controlled trial of home cook intervention to reduce salt intake in China

|                               |                                                                                                                                                                                                                                                                                                                                                                                                                                                                                                                                                                                                                                                                                                                                                                                                                                                        |
|-------------------------------|--------------------------------------------------------------------------------------------------------------------------------------------------------------------------------------------------------------------------------------------------------------------------------------------------------------------------------------------------------------------------------------------------------------------------------------------------------------------------------------------------------------------------------------------------------------------------------------------------------------------------------------------------------------------------------------------------------------------------------------------------------------------------------------------------------------------------------------------------------|
| Journal:                      | <i>BMJ Open</i>                                                                                                                                                                                                                                                                                                                                                                                                                                                                                                                                                                                                                                                                                                                                                                                                                                        |
| Manuscript ID                 | bmjopen-2019-033842                                                                                                                                                                                                                                                                                                                                                                                                                                                                                                                                                                                                                                                                                                                                                                                                                                    |
| Article Type:                 | Protocol                                                                                                                                                                                                                                                                                                                                                                                                                                                                                                                                                                                                                                                                                                                                                                                                                                               |
| Date Submitted by the Author: | 27-Aug-2019                                                                                                                                                                                                                                                                                                                                                                                                                                                                                                                                                                                                                                                                                                                                                                                                                                            |
| Complete List of Authors:     | Zhang, Xiaochang; Chinese Center for Disease Control and Prevention<br>Hu, Xiao; Beijing Center for Diseases Prevention and Control,<br>Ma, Jixiang; Chinese Center for Disease Control and Prevention<br>Zhang, Puhong ; The George Institute at Peking University Health<br>Science Center, Diabetes Program<br>Li, Yuan; The George Institute for Global Health, Peking University<br>Health Science Centre<br>Luo, Rong; The George Institute for Global Health at Peking University<br>Health Science Center,<br>He, Feng; Queen Mary University of London, Wolfson Institute of<br>Preventive Medicine<br>MacGregor, Graham; Queen Mary University of London, Wolfson Institute<br>of Preventive Medicine<br>Wang, Jinglei; Chinese Center for Disease Control and Prevention<br>Yin, Zhaoxue; Chinese Center for Disease Control and Prevention |
| Keywords:                     | Protocols & guidelines < HEALTH SERVICES ADMINISTRATION & MANAGEMENT, PUBLIC HEALTH, Salt reduction                                                                                                                                                                                                                                                                                                                                                                                                                                                                                                                                                                                                                                                                                                                                                    |
|                               |                                                                                                                                                                                                                                                                                                                                                                                                                                                                                                                                                                                                                                                                                                                                                                                                                                                        |

SCHOLARONE™  
Manuscripts

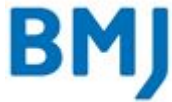

I, the Submitting Author has the right to grant and does grant on behalf of all authors of the Work (as defined in the below author licence), an exclusive licence and/or a non-exclusive licence for contributions from authors who are: i) UK Crown employees; ii) where BMJ has agreed a CC-BY licence shall apply, and/or iii) in accordance with the terms applicable for US Federal Government officers or employees acting as part of their official duties; on a worldwide, perpetual, irrevocable, royalty-free basis to BMJ Publishing Group Ltd ("BMJ") its licensees and where the relevant Journal is co-owned by BMJ to the co-owners of the Journal, to publish the Work in this journal and any other BMJ products and to exploit all rights, as set out in our [licence](#).

The Submitting Author accepts and understands that any supply made under these terms is made by BMJ to the Submitting Author unless you are acting as an employee on behalf of your employer or a postgraduate student of an affiliated institution which is paying any applicable article publishing charge ("APC") for Open Access articles. Where the Submitting Author wishes to make the Work available on an Open Access basis (and intends to pay the relevant APC), the terms of reuse of such Open Access shall be governed by a Creative Commons licence – details of these licences and which [Creative Commons](#) licence will apply to this Work are set out in our licence referred to above.

Other than as permitted in any relevant BMJ Author's Self Archiving Policies, I confirm this Work has not been accepted for publication elsewhere, is not being considered for publication elsewhere and does not duplicate material already published. I confirm all authors consent to publication of this Work and authorise the granting of this licence.

# Protocol for a cluster randomized controlled trial of home cook intervention to reduce salt intake in China

Xiaochang Zhang<sup>1\*</sup>, Xiao Hu<sup>2\*</sup>, Jixiang Ma<sup>1&</sup>, Puhong Zhang<sup>3&</sup>, Yuan Li<sup>3</sup>, Rong Luo<sup>3</sup>, Feng J He<sup>4</sup>, Graham A MacGregor<sup>4</sup>, Jinglei Wang<sup>1</sup>, Zhaoxue Yin<sup>1</sup>

\* Xiaochang Zhang and Xiao Hu contributed to the work equally and should be regarded as co-first authors.

& Correspondence to: Dr Jixiang Ma, [majx@chinacdc.cn](mailto:majx@chinacdc.cn); Dr Puhong Zhang, [zpuhong@georgeinstitute.org.cn](mailto:zpuhong@georgeinstitute.org.cn)

1. Chinese Center for Disease Control and Prevention, Beijing, China
2. Beijing Center for Diseases Prevention and Control, Beijing, China
3. The George Institute for Global Health at Peking University Health Science Center, Beijing, China
4. Wolfson Institute of Preventive Medicine, Queen Mary University of London, London, UK

## ABSTRACT

**Introduction** Salt intake in China twice the upper limit recommended by WHO, and nearly 80% is added during cooking. This study will develop a salt reduction package targeting home cooks and evaluate its effectiveness and feasibility for scale-up.

**Methods and analysis** A cluster randomized controlled trial (cRCT) design was adopted in this study. The cRCT is conducted in six provinces covering the north-, south-, and west-China. For each province, 10 communities/villages (clusters) was selected with 13 families (one cook and one adult family member) in each cluster for evaluation. In total, 780 home cooks and 780 adult family members were recruited. The home cooks in the intervention group will be provided with the intervention package, which includes community-based standardized offline and online health education and salt intake monitoring. The duration of the intervention is one year. The primary outcome is the difference between the intervention and the control group in the change of salt intake as measured by 24-hour urinary sodium from baseline to the end of the trial

and the secondary outcome is the difference between the two groups in the change of salt related KAP and blood pressure.

**Ethics and dissemination** The study has been approved by The Queen Mary Research Ethics Committee (QMERC2018/13) and Institutional Review Board of Chinese Center for Disease Control and Prevention (No.201801). The study findings will be disseminated widely through conference presentations and peer-reviewed publications and the general media.

**Trial registration number** CiChR1800016804.

### **Strengths and limitations of this study**

- The study will develop a new approach to achieving a sustainable progressive lower salt intake for long term.
- The study will use an special intervention method which is family 7-day salt intake monitoring activity to estimate and monitor salt intake, which can support study population to implement a salt reduction programme.
- The study covers a special population which is home cooks in diverse settings, for example, northern, central and southern China.
- The results should generally be applicable to the whole Chinese population.
- The study will be carried out in China only; however, the method could potentially be adopted by many other developing countries where most of the salt in the diet is added by the consumers.

## **INTRODUCTION**

Excess dietary salt consumption is an important risk factor for high blood pressure, stroke, cardiovascular disease and other adverse health outcomes<sup>1-3</sup>. As a result, in 2003 the World Health Organization (WHO) and the United Nations Food and Agriculture Organization (FAO) issued a joint report calling for a reduction in population salt intake to less than 5 g per day (<2,000 mg sodium)<sup>4</sup>. It has been estimated that mean salt consumption in 181 of 187 countries exceeded the daily intake of salt recommended by WHO in 2010, and 51 of these countries reported mean intakes greater than double the recommended amount<sup>5</sup>. In April 2019, the

1  
2  
3  
4 *Lancet* published the latest series of studies on the global burden of disease<sup>6</sup>,  
5 which found that 3 million deaths were attributable to high-salt diet in 2017.  
6 Salt reduction is highly cost-effective worldwide<sup>7-8</sup>. It has been estimated  
7 that a regulatory intervention to reduce salt intake by 3 g per day would  
8 save 194,000 to 392,000 quality-adjusted life-years and \$10 billion to \$24  
9 billion in health care costs every year in the USA<sup>9</sup>. At the United Nations  
10 General Assembly in 2011, the WHO has identified population salt  
11 reduction as a priority intervention for ameliorating the global burden of  
12 non-communicable diseases (NCDs)<sup>4</sup>. In 2013, the WHO member states  
13 agreed on a global target of a 30% relative reduction in population salt  
14 intake to be achieved by 2025<sup>10</sup>. Many developed countries have  
15 introduced programmes that seek to reduce population-level salt intake,  
16 including the UK, Finland, Japan, the US and Canada<sup>10</sup>.

17  
18 In China, the current situation of salt intake is not satisfactory. High salt  
19 intake is the third leading risk factor contributing to death and DALYs<sup>12</sup>.  
20 A cohort of 16,869 Chinese adults aged 20–60 years over the period 1991–  
21 2009 indicated that salt intake remains at high levels, double those of  
22 World Health Organization recommendations<sup>13</sup>. A study used two methods  
23 (24-hour urine collection and 24-hour dietary recall) to measure salt intake  
24 in rural China, the results showed that mean 24-hour urinary sodium  
25 excretion was 13g and 24-hour dietary salt intake was 10g<sup>14</sup>. Report on  
26 Chinese residents' chronic diseases and nutrition showed that the average  
27 daily salt intake for Chinese adults was 10.5g in 2012 which using dietary  
28 survey method<sup>15</sup>.

29  
30 In contrast with western countries, most dietary salt in China comes from  
31 salt and high-salt condiments added during cooking. The main sources of  
32 salt intake from weighed condiments recorded were from home cooking  
33 salt (74.7%) followed by soy sauce (15.0%)<sup>16</sup>.

34  
35 The Chinese government has been making great efforts in salt intake  
36 surveillance and salt reduction interventions. Shandong-MOH Action on  
37 salt and Hypertension (SMASH) project<sup>17</sup> and Healthy Lifestyle for All  
38 initiative<sup>18</sup> were two representatives. Culturally-tailored salt reduction  
39 interventions have been applied in various groups and sites, including  
40  
41  
42  
43  
44  
45  
46  
47  
48  
49  
50  
51  
52  
53  
54  
55  
56  
57  
58  
59  
60

1  
2  
3  
4 distributing salt restriction spoons and encouraging people to use the  
5 minimum order to reduce the amount of salt added during cooking<sup>19</sup>.  
6 However, the effect of such interventions needs to be evaluated in a more  
7 rigorous way<sup>20</sup>.  
8

9  
10 Since cooking salt is the biggest source of salt intake in China, home cooks,  
11 who are responsible for purchasing food and preparing meals for their  
12 family, should be given special attention during intervention activities. In  
13 Japan, cooking classes for housewives effectively reduced salt intake from  
14 9.57g/d to 8.95g/d after two months' intervention<sup>21</sup>. In China, studies  
15 specifically focusing on salt reduction among housewives are scarce and it  
16 is still unclear that which intervention is effective for family salt reduction.  
17 Hence, this study will be undertaken among home cooks in six provinces  
18 of China to explore the feasibility of reducing salt intake by means of  
19 community-based intervention, which if proven successful, will be applied  
20 to a broader scale.  
21

### 22 **Study objectives**

23 The primary objective is to increase salt awareness in home cooks, and to  
24 reduce the amount of salt used during cooking, thus helping the population  
25 to reduce salt intake by at least 1 g/day. The specific objectives include:  
26 (1) To develop a package of salt-reduction interventions through home  
27 cook applicable for community families; (2) To evaluate the effectiveness  
28 of intervention package by carrying out a cluster randomized trial with  
29 intervention duration of 12 months.  
30

## 31 **METHODS AND ANALYSIS**

### 32 **Overall Study design**

33 Using a cluster RCT design, 60 communities will be selected from 6  
34 provinces. A baseline survey will be carried out before randomization  
35 among 1560 participants recruited from the 60 communities. The  
36 communities will be allocated into intervention or control group randomly.  
37 Information of salt related Knowledge-attitude-practice (KAP), blood  
38 pressure and 24-h urinary sodium will be collected. The intervention group  
39 will receive the salt reduction education for 1 year. (Figure 1)  
40  
41  
42  
43  
44  
45  
46  
47  
48  
49  
50  
51  
52  
53  
54  
55  
56  
57  
58  
59  
60

## Study Setting

Considering the geographical location, economic level and dietary habit, our study will be undertaken in selected counties from six provinces in Qinghai, Hebei, Heilongjiang, Sichuan, Jiangxi and Hunan. The interventions are targeted on all the home cooks and their family members in the selected communities.

## Outcomes

Our primary outcome is the difference between the intervention and the control group in the change of salt intake as measured by 24-hour urinary sodium from baseline to the end of the trial.

The secondary outcome is the difference between the two groups in the change of salt related KAP and blood pressure.

## Study Population

### *Selection of communities*

A County/District will be selected from each province. And ten communities will be selected from each County/District. For the selection of communities, we will take into consideration of geographical area, urbanization, size of the populations, age structure of populations, economic status, health service resources, etc. to ensure all the communities with similar characteristics. The selected communities should have local workers to carry out the intervention activities from primary health service and supported by Neighborhood Committee (Women's federation workers). The community involved in other salt-reduction projects should be excluded.

### *Selection of participants*

Participants will be randomly selected according to age and sex. Inclusion criteria for participants include: (1) age: 18-75 years; (2) two family members from each family are included; one of them is the major cook, and the other is selected by the order of spouse, other adult family member (adult with opposite gender); (3) both eat home-made meals at least 4 days per week; (4) participants have lived in the community for more than 6 months and have no relocation plan in the next 24 months. The exclusion criteria include: (1) women in pregnant or lactation period; (2) individuals



1  
2  
3  
4 currently participate in any other clinical trial; (3) individuals who cannot  
5 or refuse to collect 24-hour urine.  
6

### 7 **Randomization**

8  
9 60 communities (clusters) will be randomly assigned (1:1) to either the  
10 intervention or the control group. Randomization will be stratified by the  
11 geographical area (urban or rural), size of populations, economic status,  
12 health service resources. The randomization will be carried out using  
13 computer generated random number system by an independent statistician  
14 who will be blind to the identity of the communities. The randomization  
15 will take place after written consents have been obtained and the baseline  
16 assessments have completed. Therefore, the participants, and the local  
17 investigators who undertake participant recruitment and data collection,  
18 will be unaware of the allocation until the point prior to the commencement  
19 of the intervention.  
20  
21  
22  
23  
24  
25  
26  
27

### 28 **Intervention**

29  
30 The primary health staff will unite with workers from neighborhood  
31 committee and/or local women's federation to carry out the following  
32 interventions under the guidance of local CDC. In the intervention group,  
33 the salt reduction intervention package will include:  
34  
35

36  
37 (1) Supportive environment, such as posters, videos and local broadcast, to  
38 deliver core messages of salt reduction. We will develop brochures, posters  
39 and videos about salt reduction targeting at home cooks. And Posters will  
40 be put up both in communities and markets. Videos will be played in the  
41 primary health institutions and at the community activities organized by  
42 neighborhood committees.  
43  
44  
45  
46

47  
48 (2) Lectures on salt reduction knowledge and skills. We will develop a set  
49 of standard slides to disseminate the knowledge and skills to reduce salt  
50 intake for the target population. The key knowledge and skills will include  
51 the relationship between salt and health, the source of salt intake, low  
52 sodium salt, misunderstanding of salt reduction, how to reduce salt intake  
53 during cooking or when eating outside, and how to wisely choose low salt  
54 pre-packaged food. These slides will be provided for the local health  
55 institutions who participate in this programme. And they will use it to  
56  
57  
58  
59  
60

1  
2  
3  
4 deliver the lectures every two month.

5 (3) Family 7-day salt intake monitoring activity. The main function of this  
6 monitoring activity is to monitor the amount of salt intake per person per  
7 day and improve the awareness of salt reduction among target population.  
8 This activity will conduct every two months, and once for 7 consecutive  
9 days. The local CDC and local primary health institutions will regularly  
10 collect the monitoring records. We will develop an applet of  
11 WeChat/webpage ahead to type in the records and calculate the average  
12 salt intake of each family member, and the results will be fed back to each  
13 family.  
14

15 (4) Online health education through social media. The national project  
16 team will publish the core knowledge of salt reduction through the WeChat  
17 public account to conduct health education for the public.  
18

19 The salt reduction education described above will not be given to the  
20 control group.  
21

### 22 **Sample Size**

23 Based on the School-EduSalt trial<sup>22</sup>, assuming a standard deviation of 24-  
24 hour urinary sodium excretion is 85mmol/day, and intra-class correlation  
25 coefficient (ICC) is 0.05, we estimate that a sample size of 1426 individuals  
26 (713 home cooks and 713 family members) would provide a power of 80%  
27 (with a two-sided alpha=0.05) to detect a difference in mean 24-hour  
28 urinary sodium  $\geq 20$ mmol/day (1g/d salt) between intervention and control  
29 group, allowing for a 20% drop-out rate of participants. We aim to recruit  
30 1 home cooks and 1 family member per household, and in order to ensure  
31 that the number of households in every community remains same, 12  
32 households in each community will be selected, resulting in a total of 720  
33 households and 1440 individuals. In addition, considering that response  
34 rate of 24-hour urine collection is often low<sup>23</sup>, we decided to add one more  
35 family per community, therefore 1560 individuals (780 home cooks and  
36 780 family members) will be recruited into the study for evaluation.  
37

### 38 **Data collection**

39 All outcome measurements and assessments will be carried out at baseline  
40 and at the end of the trial in exactly the same way in all communities for  
41  
42  
43  
44  
45  
46  
47  
48  
49  
50  
51  
52  
53  
54  
55  
56  
57  
58  
59  
60

1  
2  
3  
4 all participants, irrespective of their assignment to intervention or control  
5 group.  
6

7 The participants will be carefully instructed on how to accurately collect  
8 24-hour urine by trained research staff. On the first day, the participants  
9 will be asked to come to the survey location. The researchers will ask the  
10 participants to empty bladder and discard the urine. The researchers will  
11 record the start time and date of the 24-hour urine collection. They will  
12 then give the participants the collection equipment including containers  
13 and collection aids. On the second day at the same time, the participants  
14 will be asked to bring the urine collection bottles back to the survey  
15 location, and they will be asked to pass the last urine into the container.  
16 The researchers will record the finish time of the 24-hour urine collection.  
17 During the 24-hour urine collection period, the participants will be asked  
18 to take spare urine containers with them when they go to work. In case  
19 that the participant misses one or more urine voids or spillage occurs, the  
20 participant will be asked to do a further 24-hour urine collection. For each  
21 participant, the 24-hour urines will be collected on the same days of the  
22 week for baseline and follow-up at the end of the trial. We will measure  
23 urine volume, sodium, potassium and creatinine. Ion-selective electrode  
24 method will be used for sodium and potassium analysis and enzymatic  
25 method for creatinine assay. Twenty-four-hour urinary creatinine together  
26 with urine volume will be used to determine if the collection is likely to be  
27 complete. The biochemist who performs the measurements of urinary  
28 electrolytes will not be told to which group the participant is allocated.  
29

30 In addition to 24-hour urine collection, we will measure BP and heart rate  
31 using a validated automatic machine with the appropriate size of cuff.  
32 Three readings will be taken in the right arm at 1- to 2-min intervals at  
33 sitting position after the participant has had 10-min rest in a quiet room.  
34 Body weight, height and waist circumference will also be measured.  
35 Survey on KAP related to salt will be completed via questionnaire.  
36

37 The RCT Data will be collected through a specially designed mobile  
38 device-based electronic data capture system (mEDC) by well-trained field  
39 investigators. The RCT Data includes information on demographics,  
40  
41  
42  
43  
44  
45  
46  
47  
48  
49  
50  
51  
52  
53  
54  
55  
56  
57  
58  
59  
60

1  
2  
3 social-economic information, KAP, measurement of height, weight, waist  
4 circumference, BP, heart rate, 24-hour urine volume and electrolytes, as  
5 well as information about intervention.  
6  
7

8  
9 And in order to ensure the quality of intervention, quality control will be  
10 set in every step of the trial using the electronic system.  
11

### 12 **Statistical methods**

13  
14 The difference of 24-hour sodium excretion as well as the secondary  
15 outcomes between the two groups will be compared using linear mixed  
16 models with participants nested within family units and families nested  
17 within community/village units. We will include group (intervention,  
18 control), time (baseline, end of trial), and time×group interaction, with the  
19 time×group interaction term indicating different change by group from  
20 baseline to the end of the trial. To account for missing data on continuous  
21 outcomes, we will use the likelihood based random effects model that uses  
22 all available data and provides valid estimates of the intervention effects  
23 when data are missing at random. We will adjust for the stratification  
24 variables at randomization and potential confounding variables. We will  
25 also carry out various sensitivity analyses to examine the robustness of the  
26 conclusions of the primary analysis.  
27  
28

29  
30 SAS 9.4 will be used for the analyses. Results will be reported as mean,  
31 SD, SE, and 95% confidence interval when appropriate. All analyses were  
32 two sided, and  $P<0.05$  was considered significant.  
33  
34

### 35 **Project timelines**

36  
37 Recruitment of communities and participants started in October 2018.  
38 Baseline assessments were carried out between October and December  
39 2018. As the intervention duration is 1 year, the final follow-up  
40 assessments will be carried out between October and December 2019.  
41

### 42 **Expected outcome and potential impact**

43  
44 The study will provide a feasible and effective approach to achieving a  
45 sustainable reduction in salt intake by covering home cooks. The offline  
46 intervention methods combined with the online intervention are  
47 particularly advantageous over the traditional methods. In addition, the  
48 results should therefore be generally applicable to the whole Chinese  
49  
50  
51  
52  
53  
54  
55  
56  
57  
58  
59  
60

1  
2  
3  
4 population. If the programme is implemented and sustained across China,  
5 it will reduce population salt intake and thereby prevent hundreds of  
6 thousands of strokes, heart attacks and heart failure each year, and lead to  
7 major cost-savings to individuals, their families and the health service.  
8

9  
10 Although our study will be carried out in China, the programme of home  
11 cook intervention to reduce salt could potentially be adopted by many other  
12 countries where most of the salt in the diet is added by the consumers,  
13 which will have great public health implications.  
14  
15  
16  
17  
18

## 19 **ETHICS AND DISSEMINATION**

### 20 **Ethics**

21  
22 The study has been reviewed and approved by the Queen Mary Research  
23 Ethics Committee (QMERC2018/13) and Institutional Review Board of  
24 Chinese Center for Disease Control and Prevention (No.201801).  
25  
26

27  
28 Written consent will be obtained from all participants in the research  
29 according to well-established practices. Every participant has the right to  
30 withdraw from the study at any time.  
31  
32

33  
34 There are no substantive ethical issues associated with the conduct of our  
35 research project. The collection of the urine samples constitutes  
36 inconvenience but no risk to the individuals involved. A modest reduction  
37 in salt intake has no risk to the participants.  
38  
39

40  
41 During this study, if a participant is found to have high BP, we will  
42 recommend him/her to see a doctor and, if he/she agrees, we will help make  
43 an appointment with a doctor in a local hospital.  
44  
45

### 46 **Dissemination**

47  
48 The findings of this study will be disseminated through conference  
49 presentations, peer-reviewed publications and the general media.  
50  
51

### 52 **Acknowledgments**

53  
54 The authors would like to thank the local CDC and primary health staff  
55 who shared their opinion on the development of the intervention  
56 programme.  
57  
58  
59  
60

## Contributors

Xiaochang Zhang and Xiao Hu contributed to the work equally. Jixiang Ma, Puhong Zhang, Xiaochang Zhang, Yuan Li and Fengjun He conceived the project and designed the study. Xiaochang Zhang, Xiao Hu, Yuan Li and Rong Luo designed the intervention tools. All authors contributed to the development of the intervention and evaluation. Xiaochang Zhang and Xiao Hu wrote the first draft of the manuscript. Jixiang Ma, Fengjun He, Puhong Zhang and Yuan Li revised the draft. All authors contributed to the refinement of the study protocol and approved the final manuscript.

## Funding

The study is being funded, in full, by the National Institute of Health Research (NIHR) using Official Development Assistance funding (16/136/77). The views expressed in this publication are those of the authors and not necessarily those of the NIHR or the Department of Health and Social Care.

## Competing interests

FJH is a member of Consensus Action on Salt & Health (CASH) and World Action on Salt & Health (WASH). Both CASH and WASH are nonprofit charitable organizations, and FJH does not receive any financial support from CASH or WASH. GAM is Chairman of Blood Pressure UK (BPUK), Chairman of CASH, WASH, and Action on Sugar. BPUK, CASH, WASH and Action on Sugar are nonprofit charitable organizations. GAM does not receive any financial support from any of these organizations. Other authors have no disclosures to report.

## References:

1. Brown I J, Tzoulaki I, Candeias V, et al. Salt intakes around the world: implications for public health[J]. *International Journal of Epidemiology*, 2009, 38(3):791.
2. D. Mozaffarian, S. Fahimi, G.M. Singh. Global Sodium Consumption and Death From Cardiovascular Causes[J]. *N Engl J Med*. 2014, 371(7):624-634.
- 3 He FJ, Li J, Macgregor GA. Effect of longer term modest salt reduction on blood

1  
2  
3  
4 pressure: Cochrane systematic review and metaanalysis of randomised trials.  
5 BMJ2013;346:f1325.  
6

7 4. World Health Organization. Diet, Nutrition and the Prevention of Chronic Diseases.  
8 Report of a joint WHO/FAO expert consultation. WHO Technical report series, No.  
9 916 [Internet]. Geneva: WHO; 2003 [cited 2011 Nov 1]. Available from: ftp://  
10 ftp.fao.org/docrep/fao/005/ac911e/ac911e00.pdf  
11  
12

13 5. Powles J, Fahimi S, Micha R, et al. Global, regional and national sodium intakes in  
14 1990 and 2010: a systematic analysis of 24 h urinary sodium excretion and dietary  
15 surveys worldwide. *BMJ Open* 2013; **3**: e003733.  
16  
17

18 6. GBD 2017 Diet Collaborators. Health effects of dietary risks in 195 countries, 1990–  
19 2017: a systematic analysis for the Global Burden of Disease Study 2017 [J]. *Lancet*,  
20 2019,(4).  
21  
22

23 7. Asaria P, Chisholm D, Mathers C, Ezzati M, Beaglehole R. Chronic disease  
24 prevention: health effects and financial costs of strategies to reduce salt intake and  
25 control tobacco use. *Lancet* 2007; **370**: 2044-53.  
26  
27

28 8. Dorairaj Prabhakaran, Shuchi Anand, David Watkins, et al. Cardiovascular,  
29 respiratory, and related disorders: key messages from Disease Control Priorities, 3rd  
30 edition. *The Lancet*. , P1224-1236, March 24, 2018.  
31  
32

33 9. Bibbins-Domingo K, Chertow GM, et al. Projected effect of dietary salt reductions  
34 on future cardiovascular disease. *N Engl J Med*. 2010 Feb 18;362(7):590-9. doi:  
35 10.1056/NEJMoa0907355.  
36  
37

38 10. World Health Organization. Global action plan for the prevention and control of  
39 NCDs 2013-2020. Geneva: WHO, 2013.  
40  
41

42 11. Trieu K, Neal B, Hawkes C, et al. Salt Reduction Initiatives around the World - A  
43 Systematic Review of Progress towards the Global Target. *PLoS*  
44 *One*2015;10:e0130247.  
45  
46

47 12. Zhou M, Wang H, Zeng X, et al. Mortality, morbidity, and risk factors in China and  
48 its provinces, 1990-2017: a systematic analysis for the Global Burden of Disease Study  
49 2017. *Lancet*. 2019 Jun 24. pii: S0140-6736(19)30427-1. doi: 10.1016/S0140-  
50 6736(19)30427-1.  
51  
52

53 13. Du S, Neiman A, Batis C, et al. Understanding the patterns and trends of sodium  
54 intake, potassium intake, and sodium to potassium ratio and their effect on hypertension  
55 in China.[J]. *American Journal of Clinical Nutrition*, 2014, 99(2):334-43.  
56  
57  
58  
59  
60

14. Anderson C A, Appel L J, Okuda N, et al. Dietary sources of sodium in China, Japan, the United Kingdom, and the United States, women and men aged 40 to 59 years: the INTERMAP study.[J]. *Journal of the American Dietetic Association*, 2010, 110(5):736-45.
15. National Health and Family Planning Commission of China. Report on the Nutrition and Chronic Disease Status of Chinese Residents (2015) [M]. Beijing, China: People's Medical Publishing House, 2015.
16. Xu J, Wang M, Chen Y, et al. Estimation of salt intake by 24-hour urinary sodium excretion: a cross-sectional study in Yantai, China[J]. *Bmc Public Health*, 2014, 14(1):136.
17. Bi Z , Liang X , Xu A , et al. Hypertension Prevalence, Awareness, Treatment, and Control and Sodium Intake in Shandong Province, China: Baseline Results From Shandong–Ministry of Health Action on Salt Reduction and Hypertension (SMASH), 2011[J]. *Preventing Chronic Disease*, 2014.
18. Zhang J , Astell-Burt T , Seo D C , et al. Multilevel evaluation of ‘China Healthy Lifestyles for All’, a nationwide initiative to promote lower intakes of salt and edible oil[J]. *Preventive Medicine*, 2014, 67:210-215.
19. Chen J, Tian Y, Liao Y, Yang S, Li Z, He C, Tu D, Sun X. Salt-restriction-spoon improved the salt intake among residents in China. *PLoS One*. 2013 Nov 11;8(11):e78963. doi: 10.1371/journal.pone.0078963. eCollection 2013.
20. Wang M, Moran A E, Liu J, et al. A Meta-Analysis of Effect of Dietary Salt Restriction on Blood Pressure in Chinese Adults[J]. *Global Heart*, 2015, 10(4):291-299.e6.
21. Takada T, Imamoto M, Fukuma S, et al. Effect of cooking classes for housewives on salt reduction in family members: a cluster randomized controlled trial. *Public Health*. 2016;140:144–150.
22. He F J , Wu Y , Feng X X , et al. School based education programme to reduce salt intake in children and their families (School-EduSalt): cluster randomised controlled trial[J]. *BMJ*, 2015, 350.
23. Corinna H , Jacqui W , Murielle B . National Approaches to Monitoring Population Salt Intake: A Trade-Off between Accuracy and Practicality?[J]. *PLoS ONE*, 2012, 7(10):e46727-.



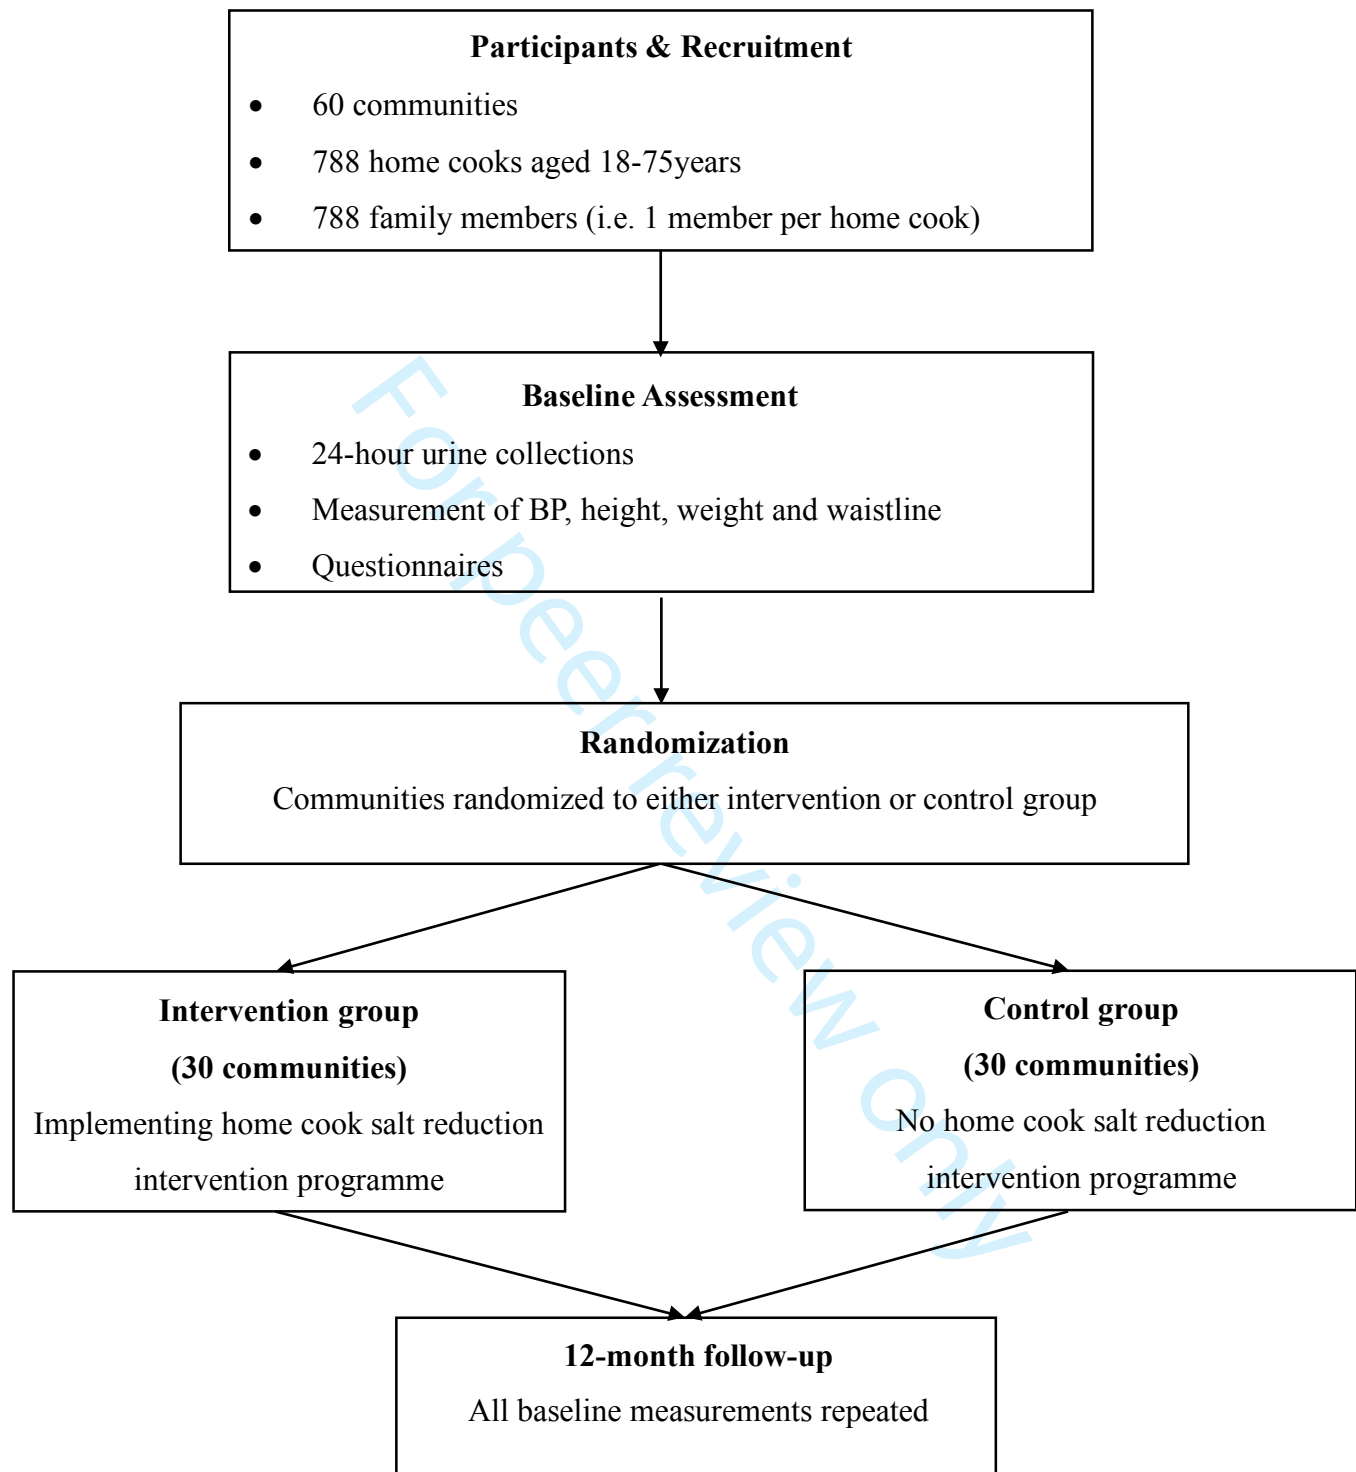

**Figure 1. Home cook intervention trial design**

# BMJ Open

## Protocol for a cluster randomized controlled trial of home cook intervention to reduce salt intake in China

|                                 |                                                                                                                                                                                                                                                                                                                                                                                                                                                                                                                                                                                                                                                                                                                                                                                                                                                        |
|---------------------------------|--------------------------------------------------------------------------------------------------------------------------------------------------------------------------------------------------------------------------------------------------------------------------------------------------------------------------------------------------------------------------------------------------------------------------------------------------------------------------------------------------------------------------------------------------------------------------------------------------------------------------------------------------------------------------------------------------------------------------------------------------------------------------------------------------------------------------------------------------------|
| Journal:                        | <i>BMJ Open</i>                                                                                                                                                                                                                                                                                                                                                                                                                                                                                                                                                                                                                                                                                                                                                                                                                                        |
| Manuscript ID                   | bmjopen-2019-033842.R1                                                                                                                                                                                                                                                                                                                                                                                                                                                                                                                                                                                                                                                                                                                                                                                                                                 |
| Article Type:                   | Protocol                                                                                                                                                                                                                                                                                                                                                                                                                                                                                                                                                                                                                                                                                                                                                                                                                                               |
| Date Submitted by the Author:   | 08-Jan-2020                                                                                                                                                                                                                                                                                                                                                                                                                                                                                                                                                                                                                                                                                                                                                                                                                                            |
| Complete List of Authors:       | Zhang, Xiaochang; Chinese Center for Disease Control and Prevention<br>Hu, Xiao; Beijing Center for Diseases Prevention and Control,<br>Ma, Jixiang; Chinese Center for Disease Control and Prevention<br>Zhang, Puhong ; The George Institute at Peking University Health<br>Science Center, Diabetes Program<br>Li, Yuan; The George Institute for Global Health, Peking University<br>Health Science Centre<br>Luo, Rong; The George Institute for Global Health at Peking University<br>Health Science Center,<br>He, Feng; Queen Mary University of London, Wolfson Institute of<br>Preventive Medicine<br>MacGregor, Graham; Queen Mary University of London, Wolfson Institute<br>of Preventive Medicine<br>Wang, Jinglei; Chinese Center for Disease Control and Prevention<br>Yin, Zhaoxue; Chinese Center for Disease Control and Prevention |
| <b>Primary Subject Heading</b>: | Public health                                                                                                                                                                                                                                                                                                                                                                                                                                                                                                                                                                                                                                                                                                                                                                                                                                          |
| Secondary Subject Heading:      | Epidemiology                                                                                                                                                                                                                                                                                                                                                                                                                                                                                                                                                                                                                                                                                                                                                                                                                                           |
| Keywords:                       | Protocols & guidelines < HEALTH SERVICES ADMINISTRATION & MANAGEMENT, PUBLIC HEALTH, Salt reduction                                                                                                                                                                                                                                                                                                                                                                                                                                                                                                                                                                                                                                                                                                                                                    |
|                                 |                                                                                                                                                                                                                                                                                                                                                                                                                                                                                                                                                                                                                                                                                                                                                                                                                                                        |

SCHOLARONE™  
Manuscripts



I, the Submitting Author has the right to grant and does grant on behalf of all authors of the Work (as defined in the below author licence), an exclusive licence and/or a non-exclusive licence for contributions from authors who are: i) UK Crown employees; ii) where BMJ has agreed a CC-BY licence shall apply, and/or iii) in accordance with the terms applicable for US Federal Government officers or employees acting as part of their official duties; on a worldwide, perpetual, irrevocable, royalty-free basis to BMJ Publishing Group Ltd ("BMJ") its licensees and where the relevant Journal is co-owned by BMJ to the co-owners of the Journal, to publish the Work in this journal and any other BMJ products and to exploit all rights, as set out in our [licence](#).

The Submitting Author accepts and understands that any supply made under these terms is made by BMJ to the Submitting Author unless you are acting as an employee on behalf of your employer or a postgraduate student of an affiliated institution which is paying any applicable article publishing charge ("APC") for Open Access articles. Where the Submitting Author wishes to make the Work available on an Open Access basis (and intends to pay the relevant APC), the terms of reuse of such Open Access shall be governed by a Creative Commons licence – details of these licences and which [Creative Commons](#) licence will apply to this Work are set out in our licence referred to above.

Other than as permitted in any relevant BMJ Author's Self Archiving Policies, I confirm this Work has not been accepted for publication elsewhere, is not being considered for publication elsewhere and does not duplicate material already published. I confirm all authors consent to publication of this Work and authorise the granting of this licence.

# Protocol for a cluster randomized controlled trial of home cook intervention to reduce salt intake in China

Xiaochang Zhang<sup>1\*</sup>, Xiao Hu<sup>2\*</sup>, Jixiang Ma<sup>1&</sup>, Puhong Zhang<sup>3&</sup>, Yuan Li<sup>3</sup>, Rong Luo<sup>3</sup>, Feng J He<sup>4</sup>, Graham A MacGregor<sup>4</sup>, Jinglei Wang<sup>1</sup>, Zhaoxue Yin<sup>1</sup>

\* Xiaochang Zhang and Xiao Hu contributed to the work equally and should be regarded as co-first authors.

& Correspondence to Dr Jixiang Ma, [majx@chinacdc.cn](mailto:majx@chinacdc.cn); Dr Puhong Zhang, [zpuhong@georgeinstitute.org.cn](mailto:zpuhong@georgeinstitute.org.cn)

1. Chinese Center for Disease Control and Prevention, Beijing, China
2. Beijing Center for Diseases Prevention and Control, Beijing, China
3. The George Institute for Global Health at Peking University Health Science Center, Beijing, China
4. Wolfson Institute of Preventive Medicine, Queen Mary University of London, London, UK

## ABSTRACT

**Introduction** Salt intake in China is twice the upper limit recommended by the World Health Organization (WHO), and nearly 80% of salt is added during cooking. This study will develop a package of salt reduction interventions targeting home cooks and evaluate its effectiveness and feasibility for scale-up.

**Methods and analysis** A cluster randomized controlled trial (cRCT)

1  
2  
3  
4 design is adopted in this study, which will be conducted in six provinces  
5 covering northern, central and southern China. For each province, 10  
6 communities/villages (clusters) with 13 families (one cook and one adult  
7 family member) will be selected in each cluster for evaluation. In total, 780  
8 home cooks and 780 adult family members will be recruited. The home  
9 cooks in the intervention group will be provided with the intervention  
10 package, including community-based standardized offline and online  
11 health education and salt intake monitoring. The duration of the  
12 intervention will be one year. The primary outcome is the difference  
13 between the intervention and control group in change in salt intake as  
14 measured by 24-hour urinary sodium from baseline to the end of the trial.  
15 The secondary outcome is the difference between the two groups in the  
16 change in salt-related KAP and blood pressure.  
17  
18  
19  
20  
21  
22  
23  
24  
25  
26  
27  
28  
29  
30

31 **Ethics and dissemination** The study has been approved by The Queen  
32 Mary Research Ethics Committee (QMERC2018/13) and Institutional  
33 Review Board of the Chinese Center for Disease Control and Prevention  
34 (No.201801). The study findings will be disseminated widely through  
35 conference presentations and peer-reviewed publications and the general  
36 media.  
37  
38  
39  
40  
41  
42  
43

44 **Trial registration number** ChiCTR1800016804.  
45  
46  
47  
48  
49

### 50 **Strengths and limitations of this study**

- 51 • A new approach will be developed to achieve long-term, sustainable  
52 progressive lower salt intake.  
53
- 54 • A 7-day salt surveillance method will be applied to estimate the salt intake  
55 of every member of the family to motivate the target population to reduce  
56  
57  
58  
59  
60

1  
2  
3  
4 salt intake.

- 5  
6  
7 • The study covers a wide range of the population through the inclusion of  
8 home cooks and their family members from diverse areas, including  
9 northern, central and southern China.  
10  
11  
12  
13 • The results should be generally applicable to the whole Chinese population.  
14  
15  
16 • The study will be carried out in China only; however, the method could  
17 potentially be adopted by many other developing countries where most of  
18 the salt in the diet is added by consumers.  
19  
20  
21  
22  
23  
24  
25

## 26 INTRODUCTION

27  
28  
29 Excess dietary salt consumption is an important risk factor for high blood  
30 pressure, stroke, cardiovascular disease and other adverse health  
31 outcomes<sup>1-3</sup>. As a result, in 2003 the WHO and the United Nations Food  
32 and Agriculture Organization (FAO) issued a joint report calling for a  
33 reduction in salt intake in the population to less than 5 g per day (<2,000  
34 mg sodium)<sup>4</sup>. It has been estimated that the mean salt consumption in 181  
35 of 187 countries exceeded the daily intake of salt recommended by the  
36 WHO in 2010, and 51 of these countries reported mean intakes greater than  
37 double the recommended amount<sup>5</sup>. In April 2019, the *Lancet* published the  
38 latest series of studies on the global burden of disease<sup>6</sup>, which found that 3  
39 million deaths were attributable to a high-salt diet in 2017.  
40  
41  
42  
43  
44  
45  
46  
47  
48  
49  
50

51  
52 Salt reduction is highly cost-effective worldwide<sup>7-8</sup>. It has been estimated  
53 that a regulatory intervention to reduce salt intake by 3 g per day would  
54 save 194,000 to 392,000 quality-adjusted life-years and \$10 to \$24 billion  
55 in health care costs every year in the USA<sup>9</sup>. At the United Nations General  
56  
57  
58  
59  
60

1  
2  
3  
4 Assembly in 2011, the WHO identified population salt reduction as a  
5 priority intervention for ameliorating the global burden of non-  
6 communicable diseases (NCDs)<sup>4</sup>. In 2013, the WHO member states agreed  
7 on a global target of a 30% relative reduction salt intake in the population  
8 to be achieved by 2025<sup>10</sup>. Many developed countries have introduced  
9 programmes that seek to reduce population-level salt intake, including the  
10 UK, Finland, Japan, the US and Canada<sup>11</sup>.  
11  
12  
13  
14  
15  
16  
17

18 In China, the current salt intake situation is not satisfactory. High salt  
19 intake is the third leading risk factor contributing to death and DALYs<sup>12</sup>.  
20 A cohort of 16,869 Chinese adults aged 20–60 years over the period of  
21 1991–2009 indicated that salt intake remains at high levels, double those  
22 of World Health Organization recommendations<sup>13</sup>. A study used two  
23 methods (24-hour urine collection and 24-hour dietary recall) to measure  
24 salt intake in rural China, and the results showed that mean 24-hour urinary  
25 sodium excretion was 13 g and 24-hour dietary salt intake was 10 g<sup>14</sup>. In  
26 2012, a report examining Chinese residents' chronic diseases and nutrition  
27 using a dietary survey showed that the average daily salt intake for Chinese  
28 adults was 10.5g<sup>15</sup>.  
29  
30  
31  
32  
33  
34  
35  
36  
37  
38  
39  
40  
41

42 In contrast to Western countries, in China, most dietary salt comes from  
43 salt and high-salt condiments that are added during cooking. A survey  
44 involving nine provinces of China showed that in 2006 the main sources  
45 of dietary sodium were from salt in home cooking (71.5%) followed by  
46 soy sauce (8.3%)<sup>16</sup>.  
47  
48  
49  
50  
51

52 The Chinese government has been making great efforts in salt intake  
53 surveillance and salt reduction interventions. The Shandong-MOH Action  
54 on Salt and Hypertension (SMASH) project<sup>17</sup> and Healthy Lifestyle for All  
55 initiative<sup>18</sup> are two representative interventions. Culturally tailored salt  
56  
57  
58  
59  
60

1  
2  
3  
4 reduction interventions have been applied in various groups and sites,  
5 including the distribution of salt restriction spoons and the encouragement  
6 of people to use the minimum amount of salt to reduce the amount of salt  
7 added during cooking<sup>19</sup>. However, the effect of such interventions must be  
8 evaluated in a more rigorous way<sup>20</sup>.  
9  
10  
11  
12

13  
14 Since cooking salt is the largest source of salt intake in China, home cooks,  
15 who are responsible for purchasing food and preparing meals for their  
16 families, should be given special attention during intervention activities. In  
17 Japan, cooking classes for housewives effectively reduced salt intake from  
18 9.57 g/d to 8.95 g/d after a two-month intervention<sup>21</sup>. In China, studies  
19 specifically focusing on salt reduction among housewives are scarce, and  
20 the type of interventions that are effective for family salt reduction remain  
21 unclear. Hence, this study will be undertaken among home cooks in six  
22 provinces of China to explore the feasibility of reducing salt intake by  
23 means of community-based intervention, which, if proven successful, will  
24 be applied on a broader scale.  
25  
26  
27  
28  
29  
30  
31  
32  
33  
34  
35  
36

### 37 **Study objectives**

38  
39  
40 The primary objective is to increase salt awareness in home cooks and to  
41 reduce the amount of salt used during cooking, thus helping the population  
42 reduce salt intake by at least 1 g/day. The specific objectives include the  
43 following: (1) to develop a package of salt reduction interventions through  
44 home cooks that are applicable to community families and (2) to evaluate  
45 the effectiveness of the intervention package by carrying out a cluster  
46 randomized trial with an intervention duration of 12 months.  
47  
48  
49  
50  
51  
52  
53  
54  
55  
56  
57

## 58 **METHODS AND ANALYSIS**

59  
60



## Overall Study design

Using a cluster RCT design, 60 communities will be selected from 6 provinces. A baseline survey will be carried out before randomization among 1560 participants recruited from the 60 communities. The communities will be allocated randomly to the intervention or control group. Information on salt-related KAP, blood pressure and 24-h urinary sodium will be collected. The intervention group will receive the salt reduction intervention for 1 year. (Figure 1)

## Study Setting

Considering the geographical location, economic level and dietary habits, our study will be undertaken in selected counties from six provinces in Qinghai, Hebei, Heilongjiang, Sichuan, Jiangxi and Hunan. The interventions will be targeted to all home cooks and their family members in the selected communities.

## Outcomes

The primary outcome is the difference between the intervention and control group in the change in salt intake as measured by 24-hour urinary sodium from baseline to the end of the trial.

The secondary outcome is the difference between the two groups in the change in salt-related KAP and blood pressure.

## Study Population

### *Selection of communities*

A county/district will be selected from each province, and ten communities will be selected from each county/district. For the selection of communities, we will take into consideration the geographical area, urbanization, size of

1  
2  
3  
4 the populations, age structure of the populations, economic status, and  
5 health service resources, among others, to ensure all the communities have  
6 similar characteristics. The selected communities should have local  
7 workers to carry out the intervention activities from the primary health  
8 service supported by the neighbourhood committee (women's federation  
9 workers). Communities involved in other salt reduction projects should be  
10 excluded.  
11  
12  
13  
14  
15  
16  
17

### 18 ***Selection of participants***

19  
20  
21 Participants will be randomly selected according to age and sex. Inclusion  
22 criteria for participants include the following: (1) age of 18-75 years; (2)  
23 two family members from each family, one of whom is the major cook and  
24 the other of whom is another adult family member (better to be of different  
25 gender, spouse is preferred); (3) consumption of homemade meals at least  
26 4 days per week by both of the family members; and (4) residence in the  
27 community for more than 6 months and no relocation plans in the next 24  
28 months. The exclusion criteria include the following: (1) women who are  
29 pregnant or lactating; (2) individuals currently participating in any other  
30 clinical trial; and (3) individuals who cannot or refuse to collect 24-hour  
31 urine.  
32  
33  
34  
35  
36  
37  
38  
39  
40  
41  
42  
43  
44

### 45 **Randomization**

46  
47 Sixty communities (clusters) will be randomly assigned (1:1) to either the  
48 intervention or the control group. Randomization will be stratified by the  
49 geographical area (urban or rural), size of the population, economic status,  
50 and health service resources. Randomization will be carried out using a  
51 computer-generated random number system by an independent statistician  
52 who will be blinded to the identity of the communities. The randomization  
53 will be implemented after receiving written consent and completing the  
54  
55  
56  
57  
58  
59  
60

1  
2  
3  
4 baseline assessments. Therefore, the participants and the local  
5  
6 investigators who undertake participant recruitment and data collection  
7  
8 will be unaware of the allocation until commencement of the intervention.  
9

## 10 **Intervention**

11  
12  
13 The intervention group will receive the salt reduction intervention package  
14 developed in this study, while the control group will not receive any of the  
15 interventions. The primary health staff will collaborate with workers from  
16 the neighbourhood committee and/or local women's federation to carry out  
17 the following interventions under the guidance of the local CDC. The salt  
18 reduction intervention package will include the following.  
19  
20  
21  
22  
23  
24

25  
26 (1) A supportive environment, such as posters, brochures, videos and local  
27 broadcasts, to deliver core messages regarding salt reduction. We will  
28 develop brochures, posters, videos and audio materials about salt reduction  
29 targeting home cooks. Additionally, posters will be put up in communities  
30 and markets. Videos will be played in primary health institutions and at  
31 community activities organized by neighbourhood committees.  
32  
33  
34  
35  
36  
37  
38

39  
40 (2) Lectures on salt reduction knowledge and skills. We will develop a set  
41 of standard slides to disseminate knowledge and skills to reduce salt intake  
42 for the target population. In the intervention communities, these slides will  
43 be provided for the local health institutions. They will organize and deliver  
44 lectures to the participants, especially the home cooks, once every two  
45 months. A total of 6 training lectures will be delivered in 12 months. The  
46 brief contents of the six courses will include salt-related health outcomes,  
47 sources of salt intake, low-sodium salt, misunderstandings of salt reduction,  
48 how to reduce salt intake during cooking or when eating outside the home,  
49 and how to wisely choose low-salt pre-packaged food.  
50  
51  
52  
53  
54  
55  
56  
57  
58  
59  
60

1  
2  
3  
4 (3) A 7-day salt intake monitoring activity. This method will be used to  
5 estimate the amount of salt intake for every member of the family and  
6 improve the awareness of salt reduction among the target population.  
7 Participants will record the frequency of dining out, consumption of  
8 processed foods and amount of salt added during cooking. The added salt  
9 will be assessed by weighing salt, soy sauce and other primary salty  
10 condiments on the first and last day of the evaluation period<sup>22</sup>. Additionally,  
11 the local CDCs and primary health institutions will help participants with  
12 the results estimated by this method and remind the families about their  
13 salt intake in relation to the set targets and highlight further action plans.

14  
15  
16  
17  
18 (4) Online health education. The national project team will publish core  
19 knowledge on salt reduction through the WeChat public account to conduct  
20 health education for the public.  
21  
22  
23  
24

### 25 **Sample Size**

26  
27  
28  
29  
30  
31  
32  
33  
34 Based on the School-EduSalt trial<sup>23</sup>, assuming a standard deviation of 24-  
35 hour urinary sodium excretion of 85 mmol/day and an intra-class  
36 correlation coefficient (ICC) of 0.05, we estimated that a sample size of  
37 1426 individuals (713 home cooks and 713 family members) would  
38 provide a power of 80% (with a two-sided alpha=0.05) to detect a  
39 difference in mean 24-hour urinary sodium  $\geq 20$  mmol/day (1 g/d salt)  
40 between the intervention and control group, allowing for a 20% drop-out  
41 rate of participants. We aim to recruit 1 home cook and 1 family member  
42 per household to ensure that the number of households in every community  
43 remains the same. We will select 12 households in each community,  
44 resulting in a total of 720 households and 1440 individuals. In addition,  
45 considering that the response rate of 24-hour urine collection is often low<sup>24</sup>,  
46 we have decided to add one more family per community, resulting in the  
47  
48  
49  
50  
51  
52  
53  
54  
55  
56  
57  
58  
59  
60

1  
2  
3  
4 recruitment of 1560 individuals (780 home cooks and 780 family members)  
5 into the study for evaluation.  
6  
7

## 8 **Data collection**

9

10  
11 All outcome measurements and assessments will be carried out at baseline  
12 and at the end of the trial in exactly the same way in all communities for  
13 all participants, irrespective of their assignment to the intervention or  
14 control group.  
15  
16  
17  
18

19  
20 The participants will be carefully instructed on how to accurately collect  
21 24-hour urine by trained research staff. On the first day, the participants  
22 will be asked to visit the survey location. The researchers will ask the  
23 participants to empty their bladders and discard the urine. The researchers  
24 will record the start time and date of the 24-hour urine collection. They will  
25 then supply the participants with collection equipment including containers  
26 and collection aids. At the same time, on the second day, the participants  
27 will be asked to bring the urine collection bottles back to the survey  
28 location and to pass the last urine into the container. The researchers will  
29 record the finish time of the 24-hour urine collection. During the 24-hour  
30 urine collection period, the participants will be asked to take spare urine  
31 containers with them to work. In case the participant misses one or more  
32 urine voids or spillage occurs, the participant will be asked to perform an  
33 additional 24-hour urine collection. For each participant, the 24-hour urine  
34 will be collected on the same days of the week for the baseline visit and  
35 follow-up visit at the end of the trial. We will measure urine volume,  
36 sodium, potassium and creatinine. An ion-selective electrode method will  
37 be used for sodium and potassium analysis and an enzymatic method for  
38 the creatinine assay. The 24-hour urinary creatinine together with the urine  
39 volume will be used to determine if the collection is likely to be complete.  
40  
41  
42  
43  
44  
45  
46  
47  
48  
49  
50  
51  
52  
53  
54  
55  
56  
57  
58  
59  
60

1  
2  
3  
4 The biochemist who performs the measurements of urinary electrolytes  
5 will be unaware of the group to which the participant is allocated.  
6  
7

8  
9 In addition to 24-hour urine collection, we will measure BP and heart rate  
10 using a validated automatic machine with the appropriate cuff size. Three  
11 readings will be taken for the right arm at 1 to 2-min intervals in a sitting  
12 position after the participant has rested for 10 min in a quiet room. Body  
13 weight, height and waist circumference will also be measured. A survey on  
14 KAP related to salt will be completed via questionnaire.  
15  
16  
17  
18  
19

20  
21 The RCT data will be collected through a specially designed mobile  
22 device-based electronic data capture system (mEDC) by well-trained field  
23 investigators. The RCT data include information on demographics, social-  
24 economic information, KAP, measurements of height, weight, waist  
25 circumference, BP, heart rate, 24-hour urine volume and electrolytes, as  
26 well as information about the intervention.  
27  
28  
29  
30  
31  
32

33  
34 Additionally, to ensure the quality of the intervention, quality control will  
35 be established at every step of the trial using the electronic system.  
36  
37  
38

### 39 **Data collection**

40  
41  
42 All cleaned and locked datasets together with the study design,  
43 questionnaire, code list and definition of database and variables will be  
44 stored with a unique ID number attached but no personal identifiers, in the  
45 China CDC, following an established standard operating procedure for  
46 data security. To guarantee the data security, the mobile app developer  
47 must follow the 'Mobile Application Information Service Regulation'  
48 issued by the Cyberspace Administration of China in 2016. Although  
49 personal data are accessible to the app developer, the disclosure of such  
50 information is prohibited. In addition to the development and maintenance  
51  
52  
53  
54  
55  
56  
57  
58  
59  
60

of a mEDC, an information technology team will also provide the data management service during the study to guarantee the safety, integrity and proper use of the data collected through the mEDC.

### **Statistical methods**

The difference in 24-hour sodium excretion as well as the secondary outcomes between the two groups will be compared using linear mixed models with participants nested within family units and families nested within community/village units. We will include group (intervention, control), time (baseline, end of trial), and time×group interactions, with the time×group interaction term indicating different changes by group from baseline to the end of the trial. To account for missing data on continuous outcomes, we will use the likelihood-based random effects model that uses all available data and provides valid estimates of the intervention effects when data are missing at random. We will adjust for the stratification variables at randomization and potential confounding variables. We will also carry out various sensitivity analyses to examine the robustness of the conclusions of the primary analysis.

SAS 9.4 will be used for the analyses. The results will be reported as the mean, SD, SE, and 95% confidence interval when appropriate. All analyses will be two-sided, and  $P < 0.05$  will be considered significant.

### **Project timelines**

Recruitment of communities and participants was started in October 2018. Baseline assessments were carried out between October and December 2018. As the intervention duration is 1 year, the final follow-up assessments will be carried out between October and December 2019.

### **Expected outcome and potential impact**

1  
2  
3  
4 The study will provide a feasible and effective approach to achieving a  
5 sustainable reduction in salt intake by targeting home cooks. The offline  
6 intervention methods combined with the online intervention are  
7 particularly advantageous over traditional methods. Therefore, the results  
8 should be generally applicable to the whole Chinese population. If the  
9 programme is implemented and sustained across China, it will reduce  
10 population salt intake and thereby prevent hundreds of thousands of strokes,  
11 heart attacks and heart failure each year, leading to major cost-savings to  
12 individuals, their families and health services.  
13  
14  
15  
16  
17  
18  
19  
20  
21

22  
23 Although our study will be conducted in China, the home cook intervention  
24 programme to reduce salt could potentially be adopted by many other  
25 countries where most of the salt in the diet is added by consumers, which  
26 will have great public health implications.  
27  
28  
29  
30

### 31 **Patient and Public Involvement**

32  
33  
34 No patient involved.  
35  
36  
37  
38  
39

## 40 **ETHICS AND DISSEMINATION**

### 41 **Ethics**

42  
43  
44  
45  
46 The study has been reviewed and approved by the Queen Mary Research  
47 Ethics Committee (QMERC2018/13) and the Institutional Review Board  
48 of the Chinese Center for Disease Control and Prevention (No.201801).  
49  
50  
51

52  
53 Written consent will be obtained from all participants in the research  
54 according to well-established practices. Every participant has the right to  
55 withdraw from the study at any time.  
56  
57  
58

59  
60 There are no substantive ethical issues associated with the conduct of our



1  
2  
3  
4 research project. The collection of urine samples constitutes inconvenience  
5 but no risk to the individuals involved. A modest reduction in salt intake  
6 has no risk to the participants.  
7  
8

9  
10 During this study, if a participant is found to have high BP, we will  
11 recommend that he/she sees a doctor, and if he/she agrees, we will help  
12 make an appointment with a doctor in a local hospital.  
13  
14  
15

### 16 17 **Dissemination**

18  
19 The findings of this study will be disseminated through conference  
20 presentations, peer-reviewed publications and the general media.  
21  
22  
23  
24  
25  
26  
27

### 28 29 **Acknowledgements**

30  
31 The authors would like to thank the local CDC and primary health staff  
32 who shared their opinions regarding the development of the intervention  
33 programme.  
34  
35  
36  
37  
38  
39

### 40 41 **Contributors**

42  
43 Xiaochang Zhang and Xiao Hu contributed to this work equally. Jixiang  
44 Ma, Puhong Zhang, Xiaochang Zhang, Yuan Li, Fengjun He, and Graham  
45 A MacGregor conceived the project and designed the study. Xiaochang  
46 Zhang, Xiao Hu, Yuan Li and Rong Luo designed the intervention tools.  
47 All authors contributed to the development of the intervention and  
48 evaluation. Xiaochang Zhang and Xiao Hu wrote the first draft of the  
49 manuscript. Jixiang Ma, Fengjun He, Puhong Zhang, Yuan Li, Graham A  
50 MacGregor, Jinglei Wang, and Zhaoxue Yin revised the manuscript draft.  
51 All authors contributed to the refinement of the study protocol and  
52  
53  
54  
55  
56  
57  
58  
59  
60

1  
2  
3  
4 approved the final manuscript.  
5  
6  
7  
8

## 9 **Funding**

10  
11  
12 The study is being funded in full by the National Institute of Health  
13 Research (NIHR) using Official Development Assistance funding  
14 (16/136/77). The views expressed in this publication are those of the  
15 authors and not necessarily those of the NIHR or the Department of Health  
16 and Social Care.  
17  
18  
19  
20  
21  
22  
23  
24  
25

## 26 **Competing interests**

27  
28  
29 FJH is a member of Consensus Action on Salt & Health (CASH) and  
30 World Action on Salt & Health (WASH). Both CASH and WASH are  
31 nonprofit charitable organizations, and FJH has not received any financial  
32 support from CASH or WASH. GAM is Chairman of Blood Pressure UK  
33 (BPUK), Chairman of CASH, WASH, and Action on Sugar. BPUK,  
34 CASH, WASH and Action on Sugar are nonprofit charitable organizations.  
35 GAM has not received receive any financial support from any of these  
36 organizations. The other authors have no disclosures to report.  
37  
38  
39  
40  
41  
42  
43  
44  
45  
46  
47  
48

## 49 **References:**

- 50  
51  
52 1. Brown I J, Tzoulaki I, Candeias V, et al. Salt intakes around the world: implications  
53 for public health[J]. *International Journal of Epidemiology*, 2009, 38(3):791.  
54  
55  
56 2. D. Mozaffarian, S. Fahimi, G.M. Singh. Global Sodium Consumption and Death  
57 From Cardiovascular Causes[J]. *N Engl J Med*. 2014, 371(7):624-634.  
58  
59  
60

1  
2  
3  
4 3 He FJ, Li J, Macgregor GA. Effect of longer term modest salt reduction on blood  
5 pressure: Cochrane systematic review and metaanalysis of randomised trials.  
6 BMJ2013;346:f1325.  
7  
8

9  
10 4. World Health Organization. Diet, Nutrition and the Prevention of Chronic Diseases.  
11 Report of a joint WHO/FAO expert consultation. WHO Technical report series, No.  
12 916 [Internet]. Geneva: WHO; 2003 [cited 2011 Nov 1]. Available from: ftp://  
13 ftp.fao.org/docrep/fao/005/ac911e/ac911e00.pdf  
14  
15  
16  
17

18  
19 5. Powles J, Fahimi S, Micha R, et al. Global, regional and national sodium intakes in  
20 1990 and 2010: a systematic analysis of 24 h urinary sodium excretion and dietary  
21 surveys worldwide. *BMJ Open* 2013; **3**: e003733.  
22  
23  
24

25  
26 6. GBD 2017 Diet Collaborators. Health effects of dietary risks in 195 countries, 1990–  
27 2017: a systematic analysis for the Global Burden of Disease Study 2017 [J]. *Lancet*,  
28 2019,(4).  
29  
30  
31

32  
33 7. Asaria P, Chisholm D, Mathers C, Ezzati M, Beaglehole R. Chronic disease  
34 prevention: health effects and financial costs of strategies to reduce salt intake and  
35 control tobacco use. *Lancet* 2007; **370**: 2044-53.  
36  
37  
38

39  
40 8. Dorairaj Prabhakaran, Shuchi Anand, David Watkins, et al. Cardiovascular,  
41 respiratory, and related disorders: key messages from Disease Control Priorities, 3rd  
42 edition. *The Lancet*. , P1224-1236, March 24, 2018.  
43  
44  
45

46  
47 9. Bibbins-Domingo K, Chertow GM, et al. Projected effect of dietary salt reductions  
48 on future cardiovascular disease. *N Engl J Med*. 2010 Feb 18;362(7):590-9. doi:  
49 10.1056/NEJMoa0907355.  
50  
51

52  
53 10. World Health Organization. Global action plan for the prevention and control of  
54 NCDs 2013-2020. Geneva: WHO, 2013.  
55  
56

57  
58 11. Trieu K, Neal B, Hawkes C, et al. Salt Reduction Initiatives around the World - A  
59  
60

1  
2  
3  
4 Systematic Review of Progress towards the Global Target. PLoS  
5 One2015;10:e0130247.  
6  
7

8  
9 12. Zhou M, Wang H, Zeng X, et al. Mortality, morbidity, and risk factors in China and  
10 its provinces, 1990-2017: a systematic analysis for the Global Burden of Disease Study  
11 2017. Lancet. 2019 Jun 24. pii: S0140-6736(19)30427-1. doi: 10.1016/S0140-  
12 6736(19)30427-1.  
13  
14  
15

16  
17 13. Du S, Neiman A, Batis C, et al. Understanding the patterns and trends of sodium  
18 intake, potassium intake, and sodium to potassium ratio and their effect on hypertension  
19 in China.[J]. American Journal of Clinical Nutrition, 2014, 99(2):334-43.  
20  
21  
22

23  
24 14. Anderson C A, Appel L J, Okuda N, et al. Dietary sources of sodium in China,  
25 Japan, the United Kingdom, and the United States, women and men aged 40 to 59 years:  
26 the INTERMAP study.[J]. Journal of the American Dietetic Association, 2010,  
27 110(5):736-45.  
28  
29  
30  
31

32  
33 15. Disease Control Bureau of National Health and Family Planning Commission of  
34 China. Report on Chinese Residents' Chronic Disease and Nutrition (2015) [M].  
35 Beijing, China: People's Medical Publishing House, 2016.  
36  
37  
38

39  
40 16. Zhang J, Zhang B, Wang Z, et al. The status of dietary sodium intake of Chinese  
41 population in nine provinces (autonomous region) from 1991 to 2006 [J]. Chinese  
42 Journal of Prevention Medicine, 2011, 45(4):310-312.  
43  
44  
45

46  
47 17. Bi Z , Liang X , Xu A , et al. Hypertension Prevalence, Awareness, Treatment, and  
48 Control and Sodium Intake in Shandong Province, China: Baseline Results From  
49 Shandong–Ministry of Health Action on Salt Reduction and Hypertension (SMASH),  
50 2011[J]. Preventing Chronic Disease, 2014.  
51  
52  
53

54  
55 18. Zhang J , Astell-Burt T , Seo D C , et al. Multilevel evaluation of ‘China Healthy  
56 Lifestyles for All’, a nationwide initiative to promote lower intakes of salt and edible  
57 oil[J]. Preventive Medicine, 2014, 67:210-215.  
58  
59  
60

- 1  
2  
3  
4 19. Chen J, Tian Y, Liao Y, Yang S, Li Z, He C, Tu D, Sun X. Salt-restriction-spoon  
5 improved the salt intake among residents in China. PLoS One. 2013 Nov  
6 11;8(11):e78963. doi: 10.1371/journal.pone.0078963. eCollection 2013.  
7  
8  
9  
10  
11 20. Wang M, Moran A E, Liu J, et al. A Meta-Analysis of Effect of Dietary Salt  
12 Restriction on Blood Pressure in Chinese Adults[J]. Global Heart, 2015, 10(4):291-  
13 299.e6.  
14  
15  
16  
17 21. Takada T, Imamoto M, Fukuma S, et al. Effect of cooking classes for housewives  
18 on salt reduction in family members: a cluster randomized controlled trial. Public  
19 Health. 2016;140:144–150.  
20  
21  
22  
23  
24 22. Zhang L, Zhao F, Zhang P, et al. A pilot study to validate a standardized one-week  
25 salt estimation method evaluating salt intake and its sources for family members in  
26 China. Nutrients 2015;7:751–63  
27  
28  
29  
30  
31 23. He F J , Wu Y , Feng X X , et al. School based education programme to reduce salt  
32 intake in children and their families (School-EduSalt): cluster randomised controlled  
33 trial[J]. BMJ, 2015, 350.  
34  
35  
36  
37  
38 24. Corinna H , Jacqui W , Murielle B . National Approaches to Monitoring Population  
39 Salt Intake: A Trade-Off between Accuracy and Practicality?[J]. PLoS ONE, 2012,  
40 7(10):e46727-.  
41  
42  
43  
44  
45  
46  
47  
48  
49  
50  
51  
52  
53  
54  
55

## 56 Figure Legends

57  
58  
59  
60

1  
2  
3  
4 **Figure1.** Home cook intervention trial design.  
5  
6  
7  
8  
9  
10  
11  
12  
13  
14  
15  
16  
17  
18  
19  
20  
21  
22  
23  
24  
25  
26  
27  
28  
29  
30  
31  
32  
33  
34  
35  
36  
37  
38  
39  
40  
41  
42  
43  
44  
45  
46  
47  
48  
49  
50  
51  
52  
53  
54  
55  
56  
57  
58  
59  
60

For peer review only

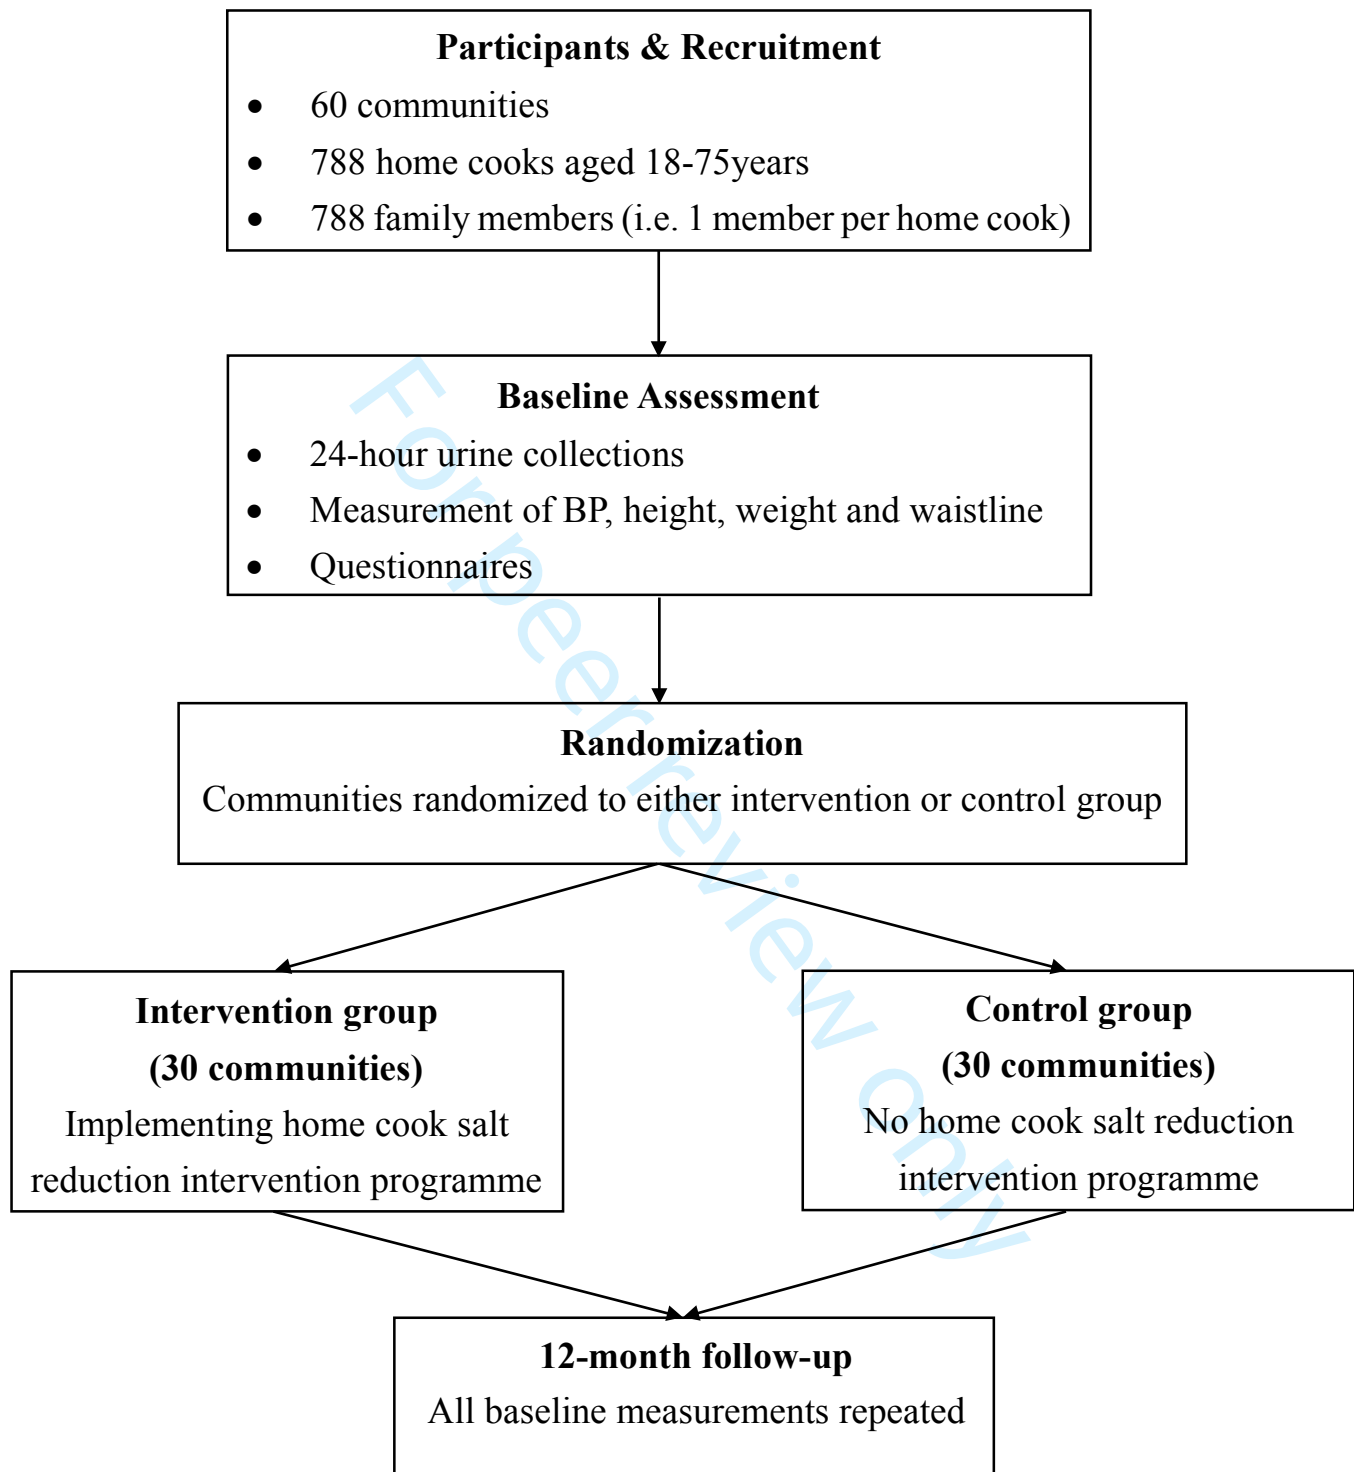

**Figure 1** Home cook intervention trial design.

# BMJ Open

## Protocol for a cluster randomized controlled trial of home cook intervention to reduce salt intake in China

|                                 |                                                                                                                                                                                                                                                                                                                                                                                                                                                                                                                                                                                                                                                                                                                                                                                                                                                        |
|---------------------------------|--------------------------------------------------------------------------------------------------------------------------------------------------------------------------------------------------------------------------------------------------------------------------------------------------------------------------------------------------------------------------------------------------------------------------------------------------------------------------------------------------------------------------------------------------------------------------------------------------------------------------------------------------------------------------------------------------------------------------------------------------------------------------------------------------------------------------------------------------------|
| Journal:                        | <i>BMJ Open</i>                                                                                                                                                                                                                                                                                                                                                                                                                                                                                                                                                                                                                                                                                                                                                                                                                                        |
| Manuscript ID                   | bmjopen-2019-033842.R2                                                                                                                                                                                                                                                                                                                                                                                                                                                                                                                                                                                                                                                                                                                                                                                                                                 |
| Article Type:                   | Protocol                                                                                                                                                                                                                                                                                                                                                                                                                                                                                                                                                                                                                                                                                                                                                                                                                                               |
| Date Submitted by the Author:   | 14-Feb-2020                                                                                                                                                                                                                                                                                                                                                                                                                                                                                                                                                                                                                                                                                                                                                                                                                                            |
| Complete List of Authors:       | Zhang, Xiaochang; Chinese Center for Disease Control and Prevention<br>Hu, Xiao; Beijing Center for Diseases Prevention and Control,<br>Ma, Jixiang; Chinese Center for Disease Control and Prevention<br>Zhang, Puhong ; The George Institute at Peking University Health<br>Science Center, Diabetes Program<br>Li, Yuan; The George Institute for Global Health, Peking University<br>Health Science Centre<br>Luo, Rong; The George Institute for Global Health at Peking University<br>Health Science Center,<br>He, Feng; Queen Mary University of London, Wolfson Institute of<br>Preventive Medicine<br>MacGregor, Graham; Queen Mary University of London, Wolfson Institute<br>of Preventive Medicine<br>Wang, Jinglei; Chinese Center for Disease Control and Prevention<br>Yin, Zhaoxue; Chinese Center for Disease Control and Prevention |
| <b>Primary Subject Heading</b>: | Public health                                                                                                                                                                                                                                                                                                                                                                                                                                                                                                                                                                                                                                                                                                                                                                                                                                          |
| Secondary Subject Heading:      | Epidemiology                                                                                                                                                                                                                                                                                                                                                                                                                                                                                                                                                                                                                                                                                                                                                                                                                                           |
| Keywords:                       | Protocols & guidelines < HEALTH SERVICES ADMINISTRATION & MANAGEMENT, PUBLIC HEALTH, Salt reduction                                                                                                                                                                                                                                                                                                                                                                                                                                                                                                                                                                                                                                                                                                                                                    |
|                                 |                                                                                                                                                                                                                                                                                                                                                                                                                                                                                                                                                                                                                                                                                                                                                                                                                                                        |

SCHOLARONE™  
Manuscripts





I, the Submitting Author has the right to grant and does grant on behalf of all authors of the Work (as defined in the below author licence), an exclusive licence and/or a non-exclusive licence for contributions from authors who are: i) UK Crown employees; ii) where BMJ has agreed a CC-BY licence shall apply, and/or iii) in accordance with the terms applicable for US Federal Government officers or employees acting as part of their official duties; on a worldwide, perpetual, irrevocable, royalty-free basis to BMJ Publishing Group Ltd ("BMJ") its licensees and where the relevant Journal is co-owned by BMJ to the co-owners of the Journal, to publish the Work in this journal and any other BMJ products and to exploit all rights, as set out in our [licence](#).

The Submitting Author accepts and understands that any supply made under these terms is made by BMJ to the Submitting Author unless you are acting as an employee on behalf of your employer or a postgraduate student of an affiliated institution which is paying any applicable article publishing charge ("APC") for Open Access articles. Where the Submitting Author wishes to make the Work available on an Open Access basis (and intends to pay the relevant APC), the terms of reuse of such Open Access shall be governed by a Creative Commons licence – details of these licences and which [Creative Commons](#) licence will apply to this Work are set out in our licence referred to above.

Other than as permitted in any relevant BMJ Author's Self Archiving Policies, I confirm this Work has not been accepted for publication elsewhere, is not being considered for publication elsewhere and does not duplicate material already published. I confirm all authors consent to publication of this Work and authorise the granting of this licence.

# Protocol for a cluster randomized controlled trial of home cook intervention to reduce salt intake in China

Xiaochang Zhang<sup>1\*</sup>, Xiao Hu<sup>2\*</sup>, Jixiang Ma<sup>1&</sup>, Puhong Zhang<sup>3&</sup>, Yuan Li<sup>3</sup>, Rong Luo<sup>3</sup>, Feng J He<sup>4</sup>, Graham A MacGregor<sup>4</sup>, Jinglei Wang<sup>1</sup>, Zhaoxue Yin<sup>1</sup>

\* Xiaochang Zhang and Xiao Hu contributed to the work equally and should be regarded as co-first authors.

& Correspondence to Dr Jixiang Ma, majx@chinacdc.cn; Dr Puhong Zhang, zpuhong@georgeinstitute.org.cn

1. Chinese Center for Disease Control and Prevention, Beijing, China
2. Beijing Center for Diseases Prevention and Control, Beijing, China
3. The George Institute for Global Health at Peking University Health Science Center, Beijing, China
4. Wolfson Institute of Preventive Medicine, Queen Mary University of London, London, UK

## ABSTRACT

**Introduction** Salt intake in China is twice the upper limit recommended by the World Health Organization (WHO), and nearly 80% of salt is added during cooking. This study will develop a package of salt reduction interventions targeting home cooks and evaluate its effectiveness and feasibility for scale-up.

**Methods and analysis** A cluster randomized controlled trial (cRCT) design is adopted in this study, which will be conducted in six provinces covering northern, central and southern China. For each province, 10 communities/villages (clusters) with 13 families (one cook and one adult family member) will be selected in each cluster for evaluation. In total, 780 home cooks and 780 adult family members will be recruited. The home cooks in the intervention group will be provided with the intervention package, including community-based standardized offline and online health education and salt intake monitoring. The duration of the intervention will be one year. The primary outcome is the difference between the intervention and control group in change in salt intake as

1  
2  
3  
4 measured by 24-hour urinary sodium from baseline to the end of the trial.  
5  
6 The secondary outcome is the difference between the two groups in the  
7  
8 change in salt-related knowledge, attitude and practice (KAP) and blood  
9  
10 pressure.

11 **Ethics and dissemination** The study has been approved by The Queen  
12  
13 Mary Research Ethics Committee (QMERC2018/13) and Institutional  
14  
15 Review Board of the Chinese Center for Disease Control and Prevention  
16  
17 (No.201801). The study findings will be disseminated widely through  
18  
19 conference presentations and peer-reviewed publications and the general  
20  
21 media.

22 **Trial registration number** ChiCTR1800016804.  
23  
24

### 25 **Strengths and limitations of this study**

- 26 • A new approach will be developed to achieve long-term, sustainable  
27  
28 progressive lower salt intake.
- 29 • A 7-day salt surveillance method will be applied to estimate the salt intake  
30  
31 of every member of the family to motivate the target population to reduce  
32  
33 salt intake.
- 34 • The study covers a wide range of the population through the inclusion of  
35  
36 home cooks and their family members from diverse areas, including  
37  
38 northern, central and southern China.
- 39 • The study will be carried out in China only; however, the method could  
40  
41 potentially be adopted by many other developing countries where most of  
42  
43 the salt in the diet is added by consumers.  
44  
45  
46  
47

## 48 **INTRODUCTION**

49 Excess dietary salt consumption is an important risk factor for high blood  
50  
51 pressure, stroke, cardiovascular disease and other adverse health  
52  
53 outcomes<sup>1-3</sup>. As a result, in 2003 the WHO and the United Nations Food  
54  
55 and Agriculture Organization (FAO) issued a joint report calling for a  
56  
57 reduction in salt intake in the population to less than 5 g per day (<2,000  
58  
59 mg sodium)<sup>4</sup>. It has been estimated that the mean salt consumption in 181  
60  
of 187 countries exceeded the daily intake of salt recommended by the

1  
2  
3  
4 WHO in 2010, and 51 of these countries reported mean intakes greater than  
5 double the recommended amount<sup>5</sup>. In April 2019, the *Lancet* published the  
6 latest series of studies on the global burden of disease<sup>6</sup>, which found that 3  
7 million deaths were attributable to a high-salt diet in 2017.  
8

9  
10 Salt reduction is highly cost-effective worldwide<sup>7-8</sup>. It has been estimated  
11 that a regulatory intervention to reduce salt intake by 3 g per day would  
12 save 194,000 to 392,000 quality-adjusted life-years and \$10 to \$24 billion  
13 in health care costs every year in the USA<sup>9</sup>. At the United Nations General  
14 Assembly in 2011, the WHO identified population salt reduction as a  
15 priority intervention for ameliorating the global burden of non-  
16 communicable diseases (NCDs)<sup>4</sup>. In 2013, the WHO member states agreed  
17 on a global target of a 30% relative reduction salt intake in the population  
18 to be achieved by 2025<sup>10</sup>. Many developed countries have introduced  
19 programmes that seek to reduce population-level salt intake, including the  
20 UK, Finland, Japan, the US and Canada<sup>11</sup>.  
21

22  
23 In China, the current salt intake situation is not satisfactory. High salt  
24 intake is the third leading risk factor contributing to death and DALYs<sup>12</sup>.  
25 A cohort of 16,869 Chinese adults aged 20–60 years over the period of  
26 1991–2009 indicated that salt intake remains at high levels, double those  
27 of World Health Organization recommendations<sup>13</sup>. A study used two  
28 methods (24-hour urine collection and 24-hour dietary recall) to measure  
29 salt intake in rural China, and the results showed that mean 24-hour urinary  
30 sodium excretion was 13 g and 24-hour dietary salt intake was 10 g<sup>14</sup>. In  
31 2012, a report examining Chinese residents' chronic diseases and nutrition  
32 using a dietary survey showed that the average daily salt intake for Chinese  
33 adults was 10.5g<sup>15</sup>.  
34

35  
36 In contrast to Western countries, in China, most dietary salt comes from  
37 salt and high-salt condiments that are added during cooking. A survey  
38 involving nine provinces of China showed that in 2006 the main sources  
39 of dietary sodium were from salt in home cooking (71.5%) followed by  
40 soy sauce (8.3%)<sup>16</sup>.  
41

42  
43 The Chinese government has been making great efforts in salt intake  
44 surveillance and salt reduction interventions. The Shandong-MOH Action  
45  
46  
47  
48  
49  
50  
51  
52  
53  
54  
55  
56  
57  
58  
59  
60

1  
2  
3  
4 on Salt and Hypertension (SMASH) project<sup>17</sup> and Healthy Lifestyle for All  
5 initiative<sup>18</sup> are two representative interventions. Culturally tailored salt  
6 reduction interventions have been applied in various groups and sites,  
7 including the distribution of salt restriction spoons and the encouragement  
8 of people to use the minimum amount of salt to reduce the amount of salt  
9 added during cooking<sup>19</sup>. However, the effect of such interventions must be  
10 evaluated in a more rigorous way<sup>20</sup>.

11  
12 Since cooking salt is the largest source of salt intake in China, home cooks,  
13 who are responsible for purchasing food and preparing meals for their  
14 families, should be given special attention during intervention activities. In  
15 Japan, cooking classes for housewives effectively reduced salt intake from  
16 9.57 g/d to 8.95 g/d after a two-month intervention<sup>21</sup>. In China, studies  
17 specifically focusing on salt reduction among housewives are scarce, and  
18 the type of interventions that are effective for family salt reduction remain  
19 unclear. Hence, this study will be undertaken among home cooks in six  
20 provinces of China to explore the feasibility of reducing salt intake by  
21 means of community-based intervention, which, if proven successful, will  
22 be applied on a broader scale.

### 23 **Study objectives**

24 The primary objective is to increase salt awareness in home cooks and to  
25 reduce the amount of salt used during cooking, thus helping the population  
26 reduce salt intake by at least 1 g/day. The specific objectives include the  
27 following: (1) to develop a package of salt reduction interventions through  
28 home cooks that are applicable to community families and (2) to evaluate  
29 the effectiveness of the intervention package by carrying out a cluster  
30 randomized trial with an intervention duration of 12 months.

## 31 **METHODS AND ANALYSIS**

### 32 **Overall Study design**

33 Using a cluster RCT design, 60 communities will be selected from 6  
34 provinces. A baseline survey will be carried out before randomization  
35 among 1560 participants recruited from the 60 communities. The  
36 communities will be allocated randomly to the intervention or control  
37  
38  
39  
40  
41  
42  
43  
44  
45  
46  
47  
48  
49  
50  
51  
52  
53  
54  
55  
56  
57  
58  
59  
60

1  
2  
3  
4 group. Information on salt-related KAP, blood pressure and 24-h urinary  
5 sodium will be collected. The intervention group will receive the salt  
6 reduction intervention for 1 year. (Figure 1)  
7

### 8 9 **Study Setting**

10 Considering the geographical location, economic level and dietary habits,  
11 our study will be undertaken in selected counties from six provinces in  
12 Qinghai, Hebei, Heilongjiang, Sichuan, Jiangxi and Hunan. The  
13 interventions will be targeted to all home cooks and their family members  
14 in the selected communities.  
15  
16  
17  
18

### 19 **Outcomes**

20  
21 The primary outcome is the difference between the intervention and control  
22 group in the change in salt intake as measured by 24-hour urinary sodium  
23 from baseline to the end of the trial.  
24

25  
26 The secondary outcome is the difference between the two groups in the  
27 change in salt-related KAP and blood pressure.  
28  
29

### 30 **Study Population**

#### 31 *Selection of communities*

32  
33 A county/district will be selected from each province, and ten communities  
34 will be selected from each county/district. For the selection of communities,  
35 we will take into consideration the geographical area, urbanization, size of  
36 the populations, age structure of the populations, economic status, and  
37 health service resources, among others, to ensure all the communities have  
38 similar characteristics. The selected communities should have local  
39 workers to carry out the intervention activities from the primary health  
40 service supported by the neighbourhood committee (women's federation  
41 workers). Communities involved in other salt reduction projects should be  
42 excluded.  
43  
44  
45  
46  
47  
48  
49

#### 50 *Selection of participants*

51  
52 Participants will be randomly selected according to age and sex. Inclusion  
53 criteria for participants include the following: (1) age of 18-75 years; (2)  
54 two family members from each family, one of whom is the major cook and  
55 the other of whom is another adult family member (better to be of different  
56 gender, spouse is preferred); (3) consumption of homemade meals at least  
57  
58  
59  
60

1  
2  
3  
4 4 days per week by both of the family members; and (4) residence in the  
5 community for more than 6 months and no relocation plans in the next 24  
6 months. The exclusion criteria include the following: (1) women who are  
7 pregnant or lactating; (2) individuals currently participating in any other  
8 clinical trial; and (3) individuals who cannot or refuse to collect 24-hour  
9 urine.  
10  
11  
12  
13

### 14 **Randomization**

15  
16 Sixty communities (clusters) will be randomly assigned (1:1) to either the  
17 intervention or the control group. Randomization will be stratified by the  
18 geographical area (urban or rural), size of the population, economic status,  
19 and health service resources. Randomization will be carried out using a  
20 computer-generated random number system by an independent statistician  
21 who will be blinded to the identity of the communities. The randomization  
22 will be implemented after receiving written consent and completing the  
23 baseline assessments. Therefore, the participants and the local  
24 investigators who undertake participant recruitment and data collection  
25 will be unaware of the allocation until commencement of the intervention.  
26  
27  
28  
29  
30  
31  
32  
33

### 34 **Intervention**

35 The intervention group will receive the salt reduction intervention package  
36 developed in this study, while the control group will not receive any of the  
37 interventions. The primary health staff will collaborate with workers from  
38 the neighbourhood committee and/or local women's federation to carry out  
39 the following interventions under the guidance of the local CDC. The salt  
40 reduction intervention package will include the following.  
41  
42  
43  
44  
45

46 (1) A supportive environment, such as posters, brochures, videos and local  
47 broadcasts, to deliver core messages regarding salt reduction. We will  
48 develop brochures, posters, videos and audio materials about salt reduction  
49 targeting home cooks. Additionally, posters will be put up in communities  
50 and markets. Videos will be played in primary health institutions and at  
51 community activities organized by neighbourhood committees.  
52  
53  
54  
55

56 (2) Lectures on salt reduction knowledge and skills. We will develop a set  
57 of standard slides to disseminate knowledge and skills to reduce salt intake  
58 for the target population. In the intervention communities, these slides will  
59  
60

1  
2  
3  
4 be provided for the local health institutions. They will organize and deliver  
5 lectures to the participants, especially the home cooks, once every two  
6 months. A total of 6 training lectures will be delivered in 12 months. The  
7 brief contents of the six courses will include salt-related health outcomes,  
8 sources of salt intake, low-sodium salt, misunderstandings of salt reduction,  
9 how to reduce salt intake during cooking or when eating outside the home,  
10 and how to wisely choose low-salt pre-packaged food.  
11  
12  
13  
14  
15

16 (3) A 7-day salt intake monitoring activity. This method will be used to  
17 estimate the amount of salt intake for every member of the family and  
18 improve the awareness of salt reduction among the target population.  
19 Participants will record the frequency of dining out, consumption of  
20 processed foods and amount of salt added during cooking. The added salt  
21 will be assessed by weighing salt, soy sauce and other primary salty  
22 condiments on the first and last day of the evaluation period<sup>22</sup>. Additionally,  
23 the local CDCs and primary health institutions will help participants with  
24 the results estimated by this method and remind the families about their  
25 salt intake in relation to the set targets and highlight further action plans.  
26  
27  
28  
29  
30  
31  
32

33 (4) Online health education. The national project team will publish core  
34 knowledge on salt reduction through the WeChat public account to conduct  
35 health education for the public.  
36  
37  
38

### 39 **Sample Size**

40 Based on the School-EduSalt trial<sup>23</sup>, assuming a standard deviation of 24-  
41 hour urinary sodium excretion of 85 mmol/day and an intra-class  
42 correlation coefficient (ICC) of 0.05, we estimated that a sample size of  
43 1426 individuals (713 home cooks and 713 family members) would  
44 provide a power of 80% (with a two-sided alpha=0.05) to detect a  
45 difference in mean 24-hour urinary sodium  $\geq 20$  mmol/day (1 g/d salt)  
46 between the intervention and control group, allowing for a 20% drop-out  
47 rate of participants. We aim to recruit 1 home cook and 1 family member  
48 per household to ensure that the number of households in every community  
49 remains the same. We will select 12 households in each community,  
50 resulting in a total of 720 households and 1440 individuals. In addition,  
51 considering that the response rate of 24-hour urine collection is often low<sup>24</sup>,  
52  
53  
54  
55  
56  
57  
58  
59  
60



1  
2  
3  
4 we have decided to add one more family per community, resulting in the  
5 recruitment of 1560 individuals (780 home cooks and 780 family members)  
6 into the study for evaluation.  
7  
8

### 9 **Data collection**

10 All outcome measurements and assessments will be carried out at baseline  
11 and at the end of the trial in exactly the same way in all communities for  
12 all participants, irrespective of their assignment to the intervention or  
13 control group.  
14  
15  
16

17 The participants will be carefully instructed on how to accurately collect  
18 24-hour urine by trained research staff. On the first day, the participants  
19 will be asked to visit the survey location. The researchers will ask the  
20 participants to empty their bladders and discard the urine. The researchers  
21 will record the start time and date of the 24-hour urine collection. They will  
22 then supply the participants with collection equipment including containers  
23 and collection aids. At the same time, on the second day, the participants  
24 will be asked to bring the urine collection bottles back to the survey  
25 location and to pass the last urine into the container. The researchers will  
26 record the finish time of the 24-hour urine collection. During the 24-hour  
27 urine collection period, the participants will be asked to take spare urine  
28 containers with them to work. In case the participant misses one or more  
29 urine voids or spillage occurs, the participant will be asked to perform an  
30 additional 24-hour urine collection. For each participant, the 24-hour urine  
31 will be collected on the same days of the week for the baseline visit and  
32 follow-up visit at the end of the trial. We will measure urine volume,  
33 sodium, potassium and creatinine. An ion-selective electrode method will  
34 be used for sodium and potassium analysis and an enzymatic method for  
35 the creatinine assay. The 24-hour urinary creatinine together with the urine  
36 volume will be used to determine if the collection is likely to be complete.  
37 The biochemist who performs the measurements of urinary electrolytes  
38 will be unaware of the group to which the participant is allocated.  
39  
40 In addition to 24-hour urine collection, we will measure BP and heart rate  
41 using a validated automatic machine with the appropriate cuff size. Three  
42 readings will be taken for the right arm at 1 to 2-min intervals in a sitting  
43  
44  
45  
46  
47  
48  
49  
50  
51  
52  
53  
54  
55  
56  
57  
58  
59  
60

1  
2  
3  
4 position after the participant has rested for 10 min in a quiet room. Body  
5 weight, height and waist circumference will also be measured. A survey on  
6 KAP related to salt will be completed via questionnaire.  
7

8  
9 The RCT data will be collected through a specially designed mobile  
10 device-based electronic data capture system (mEDC) by well-trained field  
11 investigators. The RCT data include information on demographics, social-  
12 economic information, KAP, measurements of height, weight, waist  
13 circumference, BP, heart rate, 24-hour urine volume and electrolytes, as  
14 well as information about the intervention.  
15  
16

17  
18  
19 Additionally, to ensure the quality of the intervention, quality control will  
20 be established at every step of the trial using the electronic system.  
21  
22

### 23 **Data management**

24 All cleaned and locked datasets together with the study design,  
25 questionnaire, code list and definition of database and variables will be  
26 stored with a unique ID number attached but no personal identifiers, in the  
27 China CDC, following an established standard operating procedure for  
28 data security. To guarantee the data security, the mobile app developer  
29 must follow the 'Mobile Application Information Service Regulation'  
30 issued by the Cyberspace Administration of China in 2016. Although  
31 personal data are accessible to the app developer, the disclosure of such  
32 information is prohibited. In addition to the development and maintenance  
33 of a mEDC, an information technology team will also provide the data  
34 management service during the study to guarantee the safety, integrity and  
35 proper use of the data collected through the mEDC.  
36  
37  
38  
39  
40  
41  
42  
43  
44  
45

### 46 **Statistical methods**

47 The difference in 24-hour sodium excretion as well as the secondary  
48 outcomes between the two groups will be compared using linear mixed  
49 models with participants nested within family units and families nested  
50 within community/village units. We will include group (intervention,  
51 control), time (baseline, end of trial), and time×group interactions, with the  
52 time×group interaction term indicating different changes by group from  
53 baseline to the end of the trial. To account for missing data on continuous  
54 outcomes, we will use the likelihood-based random effects model that uses  
55  
56  
57  
58  
59  
60

1  
2  
3  
4 all available data and provides valid estimates of the intervention effects  
5 when data are missing at random. We will adjust for the stratification  
6 variables at randomization and potential confounding variables. We will  
7 also carry out various sensitivity analyses to examine the robustness of the  
8 conclusions of the primary analysis.  
9

10  
11  
12 SAS 9.4 will be used for the analyses. The results will be reported as the  
13 mean, SD, SE, and 95% confidence interval when appropriate. All analyses  
14 will be two-sided, and  $P < 0.05$  will be considered significant.  
15

### 16 17 **Project timelines**

18  
19 Recruitment of communities and participants was started in October 2018.  
20 Baseline assessments were carried out between October and December  
21 2018. As the intervention duration is 1 year, the final follow-up  
22 assessments will be carried out between October and December 2019.  
23

### 24 25 **Expected outcome and potential impact**

26  
27 The study will provide a feasible and effective approach to achieving a  
28 sustainable reduction in salt intake by targeting home cooks. The offline  
29 intervention methods combined with the online intervention are  
30 particularly advantageous over traditional methods. Therefore, the results  
31 should be generally applicable to the whole Chinese population. If the  
32 programme is implemented and sustained across China, it will reduce  
33 population salt intake and thereby prevent hundreds of thousands of strokes,  
34 heart attacks and heart failure each year, leading to major cost-savings to  
35 individuals, their families and health services.  
36

37  
38 Although our study will be conducted in China, the home cook intervention  
39 programme to reduce salt could potentially be adopted by many other  
40 countries where most of the salt in the diet is added by consumers, which  
41 will have great public health implications.  
42

### 43 44 **Patient and Public Involvement**

45  
46 No patient involved.  
47

## 48 49 **ETHICS AND DISSEMINATION**

### 50 51 **Ethics**

52  
53 The study has been reviewed and approved by the Queen Mary Research  
54

1  
2  
3  
4  
5  
6  
7  
8  
9  
10  
11  
12  
13  
14  
15  
16  
17  
18  
19  
20  
21  
22  
23  
24  
25  
26  
27  
28  
29  
30  
31  
32  
33  
34  
35  
36  
37  
38  
39  
40  
41  
42  
43  
44  
45  
46  
47  
48  
49  
50  
51  
52  
53  
54  
55  
56  
57  
58  
59  
60

Ethics Committee (QMERC2018/13) and the Institutional Review Board of the Chinese Center for Disease Control and Prevention (No.201801).

Written consent will be obtained from all participants in the research according to well-established practices. Every participant has the right to withdraw from the study at any time.

There are no substantive ethical issues associated with the conduct of our research project. The collection of urine samples constitutes inconvenience but no risk to the individuals involved. A modest reduction in salt intake has no risk to the participants.

During this study, if a participant is found to have high BP, we will recommend that he/she sees a doctor, and if he/she agrees, we will help make an appointment with a doctor in a local hospital.

### **Dissemination**

The findings of this study will be disseminated through conference presentations, peer-reviewed publications and the general media.

### **Acknowledgements**

The authors would like to thank the local CDC and primary health staff who shared their opinions regarding the development of the intervention programme.

### **Contributors**

Xiaochang Zhang and Xiao Hu contributed to this work equally. Jixiang Ma, Puhong Zhang, Xiaochang Zhang, Yuan Li, Fengjun He, and Graham A MacGregor conceived the project and designed the study. Xiaochang Zhang, Xiao Hu, Yuan Li and Rong Luo designed the intervention tools. All authors contributed to the development of the intervention and evaluation. Xiaochang Zhang and Xiao Hu wrote the first draft of the manuscript. Jixiang Ma, Fengjun He, Puhong Zhang, Yuan Li, Graham A MacGregor, Jinglei Wang, and Zhaoxue Yin revised the manuscript draft. All authors contributed to the refinement of the study protocol and approved the final manuscript.

## Funding

The study is being funded in full by the National Institute of Health Research (NIHR) using Official Development Assistance funding (16/136/77). The views expressed in this publication are those of the authors and not necessarily those of the NIHR or the Department of Health and Social Care.

## Competing interests

FJH is a member of Consensus Action on Salt & Health (CASH) and World Action on Salt & Health (WASH). Both CASH and WASH are nonprofit charitable organizations, and FJH has not received any financial support from CASH or WASH. GAM is Chairman of Blood Pressure UK (BPUK), Chairman of CASH, WASH, and Action on Sugar. BPUK, CASH, WASH and Action on Sugar are nonprofit charitable organizations. GAM has not received receive any financial support from any of these organizations. The other authors have no disclosures to report.

## Data sharing

The de-identified participant-level data, research forms and statistical code generated and/or analysed during this study are not publicly available due to confidentiality requirements but are available from the corresponding author on reasonable request after April 1st, 2022. Also, any data cross-border transfer must obtain official approval for relevant governmental authorities. Any data/dataset sharing with other parties will be recorded and formulated in written contractual agreements.

## References:

1. Brown I J, Tzoulaki I, Candeias V, et al. Salt intakes around the world: implications for public health[J]. *International Journal of Epidemiology*, 2009, 38(3):791.
2. D. Mozaffarian, S. Fahimi, G.M. Singh. Global Sodium Consumption and Death From Cardiovascular Causes[J]. *N Engl J Med*. 2014, 371(7):624-634.
- 3 He FJ, Li J, Macgregor GA. Effect of longer term modest salt reduction on blood pressure: Cochrane systematic review and metaanalysis of randomised trials.

1  
2  
3  
4  
5  
6  
7  
8  
9  
10  
11  
12  
13  
14  
15  
16  
17  
18  
19  
20  
21  
22  
23  
24  
25  
26  
27  
28  
29  
30  
31  
32  
33  
34  
35  
36  
37  
38  
39  
40  
41  
42  
43  
44  
45  
46  
47  
48  
49  
50  
51  
52  
53  
54  
55  
56  
57  
58  
59  
60

BMJ2013;346:f1325.

4. World Health Organization. Diet, Nutrition and the Prevention of Chronic Diseases. Report of a joint WHO/FAO expert consultation. WHO Technical report series, No. 916 [Internet]. Geneva: WHO; 2003 [cited 2011 Nov 1]. Available from: <ftp://ftp.fao.org/docrep/fao/005/ac911e/ac911e00.pdf>

5. Powles J, Fahimi S, Micha R, et al. Global, regional and national sodium intakes in 1990 and 2010: a systematic analysis of 24 h urinary sodium excretion and dietary surveys worldwide. *BMJ Open* 2013; **3**: e003733.

6. GBD 2017 Diet Collaborators. Health effects of dietary risks in 195 countries, 1990–2017: a systematic analysis for the Global Burden of Disease Study 2017 [J]. *Lancet*, 2019,(4).

7. Asaria P, Chisholm D, Mathers C, Ezzati M, Beaglehole R. Chronic disease prevention: health effects and financial costs of strategies to reduce salt intake and control tobacco use. *Lancet* 2007; **370**: 2044-53.

8. Dorairaj Prabhakaran, Shuchi Anand, David Watkins, et al. Cardiovascular, respiratory, and related disorders: key messages from Disease Control Priorities, 3rd edition. *The Lancet*. , P1224-1236, March 24, 2018.

9. Bibbins-Domingo K, Chertow GM, et al. Projected effect of dietary salt reductions on future cardiovascular disease. *N Engl J Med*. 2010 Feb 18;362(7):590-9. doi: 10.1056/NEJMoa0907355.

10. World Health Organization. Global action plan for the prevention and control of NCDs 2013-2020. Geneva: WHO, 2013.

11. Trieu K, Neal B, Hawkes C, et al. Salt Reduction Initiatives around the World - A Systematic Review of Progress towards the Global Target. *PLoS One*2015;10:e0130247.

12. Zhou M, Wang H, Zeng X, et al. Mortality, morbidity, and risk factors in China and its provinces, 1990-2017: a systematic analysis for the Global Burden of Disease Study 2017. *Lancet*. 2019 Jun 24. pii: S0140-6736(19)30427-1. doi: 10.1016/S0140-6736(19)30427-1.

13. Du S, Neiman A, Batis C, et al. Understanding the patterns and trends of sodium intake, potassium intake, and sodium to potassium ratio and their effect on hypertension in China.[J]. *American Journal of Clinical Nutrition*, 2014, 99(2):334-43.

14. Anderson C A, Appel L J, Okuda N, et al. Dietary sources of sodium in China,

1  
2  
3  
4 Japan, the United Kingdom, and the United States, women and men aged 40 to 59 years:  
5 the INTERMAP study.[J]. *Journal of the American Dietetic Association*, 2010,  
6 110(5):736-45.

7  
8  
9 15. Disease Control Bureau of National Health and Family Planning Commission of  
10 China. Report on Chinese Residents' Chronic Disease and Nutrition (2015) [M].  
11 Beijing, China: People's Medical Publishing House, 2016.

12  
13  
14 16. Zhang J, Zhang B, Wang Z, et al. The status of dietary sodium intake of Chinese  
15 population in nine provinces (autonomous region) from 1991 to 2006 [J]. *Chinese*  
16 *Journal of Prevention Medicine*, 2011, 45(4):310-312.

17  
18  
19 17. Bi Z , Liang X , Xu A , et al. Hypertension Prevalence, Awareness, Treatment, and  
20 Control and Sodium Intake in Shandong Province, China: Baseline Results From  
21 Shandong–Ministry of Health Action on Salt Reduction and Hypertension (SMASH),  
22 2011[J]. *Preventing Chronic Disease*, 2014.

23  
24  
25 18. Zhang J , Astell-Burt T , Seo D C , et al. Multilevel evaluation of ‘China Healthy  
26 Lifestyles for All’, a nationwide initiative to promote lower intakes of salt and edible  
27 oil[J]. *Preventive Medicine*, 2014, 67:210-215.

28  
29  
30 19. Chen J, Tian Y, Liao Y, Yang S, Li Z, He C, Tu D, Sun X. Salt-restriction-spoon  
31 improved the salt intake among residents in China. *PLoS One*. 2013 Nov  
32 11;8(11):e78963. doi: 10.1371/journal.pone.0078963. eCollection 2013.

33  
34  
35 20. Wang M, Moran A E, Liu J, et al. A Meta-Analysis of Effect of Dietary Salt  
36 Restriction on Blood Pressure in Chinese Adults[J]. *Global Heart*, 2015, 10(4):291-  
37 299.e6.

38  
39  
40 21. Takada T, Imamoto M, Fukuma S, et al. Effect of cooking classes for housewives  
41 on salt reduction in family members: a cluster randomized controlled trial. *Public*  
42 *Health*. 2016;140:144–150.

43  
44  
45 22. Zhang L, Zhao F, Zhang P, et al. A pilot study to validate a standardized one-week  
46 salt estimation method evaluating salt intake and its sources for family members in  
47 China. *Nutrients* 2015;7:751–63

48  
49  
50 23. He F J , Wu Y , Feng X X , et al. School based education programme to reduce salt  
51 intake in children and their families (School-EduSalt): cluster randomised controlled  
52 trial[J]. *BMJ*, 2015, 350.

53  
54  
55 24. Corinna H , Jacqui W , Murielle B . National Approaches to Monitoring Population  
56 Salt Intake: A Trade-Off between Accuracy and Practicality?[J]. *PLoS ONE*, 2012,

1  
2  
3  
4 7(10):e46727-  
5  
6  
7  
8  
9

## 10 **Figure Legends**

11  
12  
13  
14 **Figure1.** Home cook intervention trial design.  
15  
16  
17  
18  
19  
20  
21  
22  
23  
24  
25  
26  
27  
28  
29  
30  
31  
32  
33  
34  
35  
36  
37  
38  
39  
40  
41  
42  
43  
44  
45  
46  
47  
48  
49  
50  
51  
52  
53  
54  
55  
56  
57  
58  
59  
60

For peer review only





**Figure 1** Home cook intervention trial design.
